# Supplementary material for: Public support for tobacco control policy extensions in Western Australia: a cross-sectional study
Source: PubMed Central journal article supplement — BMJ Open. 2012 Mar 1;2(2):e000784. doi: 10.1136/bmjopen-2011-000784 (PMC3293129; doi:10.1136/bmjopen-2011-000784), 2012-03-01
Supplement: bmjopen-2011-000784.draft_revisions.pdf [file bmjopen-2011-000784.draft_revisions.pdf]

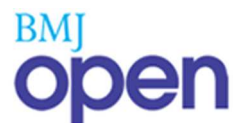

**Public support for tobacco control policy extensions: An analytical cross-sectional study**

|                                 |                                                                                                                                                                                                                                                                                                                                                                                                                                                          |
|---------------------------------|----------------------------------------------------------------------------------------------------------------------------------------------------------------------------------------------------------------------------------------------------------------------------------------------------------------------------------------------------------------------------------------------------------------------------------------------------------|
| Journal:                        | <i>BMJ Open</i>                                                                                                                                                                                                                                                                                                                                                                                                                                          |
| Manuscript ID:                  | bmjopen-2011-000784                                                                                                                                                                                                                                                                                                                                                                                                                                      |
| Article Type:                   | Research                                                                                                                                                                                                                                                                                                                                                                                                                                                 |
| Date Submitted by the Author:   | 20-Dec-2011                                                                                                                                                                                                                                                                                                                                                                                                                                              |
| Complete List of Authors:       | Rosenberg, Michael; University of Western Australia, Health Promotion Evaluation Unit<br>Pettigrew, Simone; University of Western Australia, Health Promotion Evaluation Unit<br>Wood, Lisa; University of Western Australia, School of Population Health<br>Ferguson, Renee; University of Western Australia, Health Promotion Evaluation Unit<br>Houghton, Stephen; University of Western Australia, Centre for Child and Adolescent Related Disorders |
| <b>Primary Subject Heading</b>: | Health policy                                                                                                                                                                                                                                                                                                                                                                                                                                            |
| Secondary Subject Heading:      | Smoking and tobacco                                                                                                                                                                                                                                                                                                                                                                                                                                      |
| Keywords:                       | Health policy < HEALTH SERVICES ADMINISTRATION & MANAGEMENT, PUBLIC HEALTH, Health & safety < HEALTH SERVICES ADMINISTRATION & MANAGEMENT                                                                                                                                                                                                                                                                                                                |
|                                 |                                                                                                                                                                                                                                                                                                                                                                                                                                                          |

SCHOLARONE™  
Manuscripts

only

1  
2  
3 **Title: Public support for tobacco control policy extensions: An analytical cross-sectional**  
4 **study**  
5  
6  
7

8 **Authors:**  
9

10 Michael Rosenberg, Associate Professor  
11 Health Promotion Evaluation Unit, School of Sport Science, Exercise and Health  
12 The University of Western Australia  
13 M408, 35 Stirling Highway, Crawley WA 6009  
14 (e) michael.rosenberg@uwa.edu.au  
15 (t) 08 6488 4654  
16 (f) 08 6488 1039  
17  
18

19 Simone Pettigrew, Professor (**Corresponding author**)  
20 Health Promotion Evaluation Unit, School of Sport Science, Exercise and Health,  
21 The University of Western Australia  
22 M408, 35 Stirling Highway, Crawley WA 6009  
23 (e) michael.rosenberg@uwa.edu.au  
24 (t) 08 6488 4654  
25 (f) 08 6488 1039  
26  
27

28 Lisa Wood, Associate Professor  
29 Centre for the Built Environment and Health, School of Population Health,  
30 The University of Western Australia, Perth, Australia.  
31

32 Renee Ferguson, Research Associate  
33 Health Promotion Evaluation Unit, School of Sport Science, Exercise and Health,  
34 The University of Western Australia, Perth, Australia.  
35  
36

37 Stephen Houghton, Winthrop Professor  
38 Centre for Child and Adolescent Related Disorders,  
39 The University of Western Australia, Perth, Australia.  
40  
41

42 **Keywords**  
43

44 Smoking bans, open spaces, plain packaging, public support.  
45  
46  
47  
48

49 **Word Count**  
50

51 2,235  
52  
53  
54  
55  
56  
57  
58  
59  
60

## Article Summary

### 1) Article Focus:

- This study assessed public support in Australia for progressive tobacco control policies in the form of plain packaging of cigarettes and smoking bans in outdoor locations.
- The results can inform policy makers' efforts to develop and implement new tobacco control policies.

### 2) Key Messages

- Around a quarter of all respondents and a third of smokers disagreed with the introduction of plain packaging. The majority was supportive or neutral on the issue.
- A majority of respondents supported smoking bans at a broad range of venues including parks, zoos, and community events. Support was strongest among parents and for smaller outdoor venues.
- The results indicate that new regulations relating to plain packaging and smoking bans in outdoor locations are likely to receive considerable public support.

### 3) Strengths and Limitations

- The large sample (n=2,005) and use of random digit dialling provide robust results relating to the likely responses of Western Australians to new tobacco control policies.
- Further research is needed in other countries to assess the extent to which the results reflect prevailing community views elsewhere.

## ABSTRACT

**Objectives:** Policy makers seeking to introduce new tobacco control measures need to anticipate community support to assist them in planning appropriate implementation strategies. This study assessed community support for plain packaging and smoking bans in outdoor locations in Australia.

**Design:** Analytical cross-sectional survey.

**Setting and participants:** 2,005 Western Australian adults participated in a computer-assisted telephone interview. Random household telephone numbers were used to obtain a representative sample.

**Outcome measures:** Support for plain packaging of cigarettes and smoking bans at outdoor venues by demographic characteristics

**Results:** Around half of the survey respondents supported plain packaging and almost a further quarter reported being neutral on the issue. Only one in three smokers disagreed with the introduction of a plain packaging policy. A majority of respondents supported smoking bans at five of the six nominated venues, with support being strongest among those with children under the age of 15 years. The venues with the highest levels of support were those where smoke-free policies had already been voluntarily introduced by the venue managers, where children were most likely to be in attendance, and that were more limited in size.

**Conclusion:** The study results demonstrate community support for new tobacco control policies. This evidence can be used by public policy makers in their deliberations relating to the introduction of more extensive tobacco control regulations.

## INTRODUCTION

Tobacco control policies to date have encompassed various elements including cessation assistance, taxation, restrictions on tobacco advertising, tobacco packaging regulations, and designation of non-smoking areas.(1) Most tobacco control policies have considerable public support across varying countries and among both smokers and non-smokers.(2-9) As the evidence base relating to the harms associated with second-hand smoke grows and tobacco consumption becomes increasingly de-normalised in many countries, some governments are stepping up their efforts to further discourage smoking at a population level.(10, 11) Two areas of possible tobacco control policy extension include plain packaging of cigarettes and smoking bans in outdoor locations.(1, 2, 11)

Recent research indicates that plain packaging may reduce demand for cigarettes.(12, 13) In a world first, legislation has been passed in Australia that requires plain packaging to be phased in on all cigarette packages during 2012.(14) There has been considerable support for plain packaging among key stakeholders, including public health advocates and the three primary political parties.(1, 15) However, anecdotal evidence suggests that the issue is more contentious among the general public, an outcome that is at least partly attributed to concerted efforts by the tobacco industry to incite public opposition to the change.(15) Research is therefore necessary to gauge levels of support for plain packaging to assist governments in planning appropriate implementation strategies.

Restrictions on smoking in public places have been found to be effective in terms of achieving compliance among smokers and reducing exposure to second-hand smoke.(4) Bans can normalise non-smoking in certain locations in a relatively short period of time.(8, 16)

1  
2  
3 While numerous countries have implemented smoking bans in workplaces, restaurants, and  
4 bars,(16, 17) and in some cases the outdoor areas adjacent to these locations,(11) other  
5 outdoor locations remain mostly unregulated. To date there appears to have been little  
6 research on the extent of support for bans in outdoor locations characterised by open spaces  
7 that are not adjacent to buildings. In their review of the few studies that have explored this  
8 issue, Thomson, Wilson, and Edwards noted that there are typically high levels of community  
9 support, but that further research is needed to more comprehensively assess the extent of  
10 support for such bans and how this may vary in different contexts.(18)  
11  
12  
13  
14  
15  
16  
17  
18  
19  
20  
21  
22

23 Evidence of support for new tobacco control policies is useful for governments attempting to  
24 ensure that legislative changes are aligned with community attitudes.(2, 9, 17) In addition,  
25 information relating to variations in attitudes among different stakeholder groups can assist in  
26 ensuring that new policies are effectively communicated to enhance acceptance and  
27 compliance.(2, 19) To this end, the present study investigated public support for plain  
28 packaging of cigarettes and smoking bans at a range of outdoor venues. Australia, the context  
29 of the study, is acknowledged to be one of the world leaders in tobacco control  
30 interventions.(6, 7, 17) Anti-smoking attitudes have become more prevalent over the last  
31 decade,(11) and the proportion of the adult population classified as regular smokers has  
32 decreased to 19%.(20) These outcomes have been attributed to ongoing public education  
33 campaigns and other tobacco control strategies implemented since the 1970s.(11, 21) The  
34 purpose of the study was to investigate whether the population is amenable to further policy  
35 extensions. The study received clearance from the UWA Human Ethics Committee and there  
36 were no competing interests to declare.  
37  
38  
39  
40  
41  
42  
43  
44  
45  
46  
47  
48  
49  
50  
51  
52  
53  
54  
55  
56  
57  
58  
59  
60

## METHOD

### Sample and Survey Design

Data for this study were collected via a household telephone survey in November, 2010.

Respondents were residents of Western Australia aged 18-69 years. Telephone numbers were randomly selected from an electronic household telephone directory. The adult in the house with the next birthday was invited to participate in the survey. Up to 10 call backs were made to each household to maximise the response rate, resulting in a response rate of 60% amongst eligible households. The final sample comprised 2,005 respondents, 66% of whom resided in the Perth Metropolitan area and the remainder in country areas. To adjust for any differences from the general population, the sample was weighted to the age and location distribution of the Western Australian population aged 16-69 years according to 2006 census data.(22)

The survey instrument comprised a range of questions relating to lifestyle and attitudes to smoking. One item asked respondents whether they agreed, disagreed, or had no feelings about the introduction of plain packaging on cigarettes. The Australian Government had announced its intention to introduce plain packaging in April 2010,(15) and it was likely that many respondents were aware of this at the time of the survey. Other survey items asked respondents whether they supported, did not support, or had no feelings either way about smoke-free policies in six outdoor venues: the Perth Zoo, the South Perth Foreshore Family Zone (a riverfront venue for music festivals), the Perth Royal Show (an annual agricultural event), Adventure World (a theme park), Kings Park (a national park located adjacent to the city centre), and Rottnest Island (a holiday resort island located 20 kilometres from the mainland). The purposefully selected venues represented a wide range of locations, including

1  
2  
3 some that had elected to be smoke free<sup>1</sup> and others that had no smoking policies at the time of  
4  
5 data collection. Some of the venues were family oriented, while others attracted the general  
6  
7 population. Some were permanent fixtures, while others were annual or seasonal events.  
8  
9

### 10 11 12 **Statistical Analyses**

13  
14 Data analysis comprised descriptive statistics to ascertain attitudes towards the two proposed  
15  
16 tobacco control policies. The Chi Square statistic was used to determine significant  
17  
18 association between policy support and participant characteristics (age, gender, smoking  
19  
20 status, and having a child under 15 years of age). Multinomial logistic regression models  
21  
22 were used to generate odds ratios for agreement/no agreement with the proposed policies,  
23  
24 adjusting for respondents who 'had no feelings either way' and the participant characteristics  
25  
26 explored in the descriptive analyses. All statistical analyses were performed using SPSS 19.0.  
27  
28  
29  
30  
31

32 The study was funded by the Western Australian Health Promotion Foundation. All authors  
33  
34 contributed substantially to the study. MR, LW, and RF conceptualised the design and  
35  
36 implemented data collection. MR, RF, SP, and SH were involved in data analysis and  
37  
38 interpretation. All authors contributed to the literature review and writing of the article. Other  
39  
40 than the results presented below, no additional data are available.  
41  
42  
43  
44

### 45 46 **RESULTS**

47 The sample comprised 1,016 males (50.7%) and 989 females (49.3%), with 29.3% (n=588)  
48  
49 aged 16-29 years, 42.0% (n=842) aged 30-49 years and 28.7% (n=575) aged 50-69 years.  
50  
51 Almost two-thirds of respondents (63.5%; n=1,273) had no children under 15 years of age,  
52  
53 and around half (53.5%; n=1,073) had completed post-secondary education. Current smokers  
54  
55

56  
57 

---

<sup>1</sup> These venues had recently received sponsorship funding from the Western Australian Health Promotion  
58  
59 Foundation to facilitate the introduction of smoke-free policies.  
60



1  
2  
3 comprised 12.3% (n=344) of the sample, ex-smokers 22.6% (n=473), and those who had  
4  
5 never smoked 59% (n=1,189). A significantly higher proportion of males than females were  
6  
7 current smokers (21.9% vs 12.3%;  $p < 0.00$ ).  
8  
9

10  
11 When asked about their support for the introduction of plain packaging, 50.6% (n=1,015) of  
12  
13 respondents agreed with the initiative, 26.6% (n=533) disagreed, and 22.8% (n=457) reported  
14  
15 that they had no feelings either way. Approximately one-third of current smokers (33.7%; n =  
16  
17 116) agreed with the introduction of plain packaging, 37.8% (n=130) disagreed, and 28.5%  
18  
19 (n=98) were neutral. Non-smokers (including ex-smokers) were 2.7 times (95% CI; 2.0 – 3.6)  
20  
21 more likely than smokers to agree, while smokers were 2.6 times (95% CI 1.9 – 3.6) more  
22  
23 likely to have no feelings either way. Males were more likely than females to agree with plain  
24  
25 packaging (53.3% vs 47.8%; OR = 1.4, 95% CI; 1.1 – 1.7) and less likely to have no feelings  
26  
27 either way (21.3% vs 24.4%; OR = 0.9, 95% CI; 0.7 – 1.2). Compared with respondents aged  
28  
29 16-29 years (42.0%), respondents aged 50-69 years of age (55.1%) were 2.0 (95% CI; 1.5 –  
30  
31 2.7) times more likely to agree with the introduction of plain packaging.  
32  
33  
34  
35  
36  
37

38  
39 As can be seen in Table 1, support for smoking bans was strong for four of the six specified  
40  
41 outdoor locations. Those who had never smoked and those with children under 15 years of  
42  
43 age demonstrated the highest levels of support for smoking bans at all six venues. Of note is  
44  
45 that support was strong among smokers for some venues, especially the South Perth  
46  
47 Foreshore and the Zoo.  
48  
49  
50  
51  
52  
53  
54  
55  
56  
57  
58  
59  
60

Table 1: Support for outdoor smoking bans by venue and respondent characteristics

| Venue                                              | Total<br>(n=2005)<br>% | Male<br>(n=1016)<br>% | Female<br>(n=989)<br>% | Non-Smoker<br>(n=1189)<br>% | Ex-smoker<br>(n=472)<br>% | Smoker<br>(n=343)<br>% | No child under 15<br>(n=1273)<br>% | Child under 15<br>(n=732)<br>% |
|----------------------------------------------------|------------------------|-----------------------|------------------------|-----------------------------|---------------------------|------------------------|------------------------------------|--------------------------------|
| Perth Zoo <sup>a,b,c</sup>                         | 85                     | 81                    | 89                     | 90                          | 84                        | 68                     | 83                                 | 88                             |
| South Perth Foreshore Family Zone <sup>a,b,c</sup> | 82                     | 80                    | 84                     | 85                          | 82                        | 72                     | 80                                 | 85                             |
| Perth Royal Show <sup>b</sup>                      | 80                     | 77                    | 83                     | 96                          | 78                        | 60                     | 77                                 | 84                             |
| Adventure world theme park <sup>a,b,c</sup>        | 77                     | 74                    | 81                     | 83                          | 77                        | 58                     | 75                                 | 81                             |
| Kings Park <sup>b</sup>                            | 52                     | 52                    | 54                     | 62                          | 49                        | 26                     | 52                                 | 53                             |
| Rottneest Island <sup>b</sup>                      | 43                     | 42                    | 44                     | 51                          | 40                        | 19                     | 42                                 | 45                             |

Significant associations at the  $p < 0.01$  level for each venue are represented as “a” for gender, “b” for smoking status, and “c” for having a child under 15.

Table 2 provides the odds ratios for the variables of gender, age, parental status, and smoking status. Respondents’ smoking status was the strongest indicator of likely support, with significant and large differences in the odds ratios of ex-smokers and non-smokers compared with smokers for each of the venues. Independent of smoking status, females were more likely than males to support the Perth Zoo, the South Perth Foreshore, and the Perth Royal Show becoming smoke free venues. Independent of smoking status, gender had little impact on support for smoke free venues, with the exception of females who were 1.3 times more likely than males to support the Zoo being a non-smoking venue. Similarly, age was observed to have little independent effect on support for smoke free venues, with the exceptions of Adventure World, where a smoking ban was supported significantly more by respondents aged 30+ years, and Kings Park, where respondents aged 30-49 years were less likely to support a smoking ban.

Respondents with children under 15 years of age were more likely than other respondents to support smoking bans at the South Perth Foreshore, the Royal Show, and Adventure World.

Females with children under 15 years of age were 1.6 (95% CI; 1.08 – 2.49) times more likely than other females to support smoking bans at the Zoo. No significant independent relationship was observed for parental status and support for the introduction of bans at Kings Park, the Zoo, or the South Perth Foreshore.

Table 2: Support for smoking bans at nominated outdoor venues

|                      | Zoo<br><i>OR</i><br>(95% CI) | South Perth<br><i>OR</i><br>(95% CI) | Royal Show<br><i>OR</i><br>(95% CI) | Adventure<br>world<br><i>OR</i><br>(95% CI) | Kings Park<br><i>OR</i><br>(95% CI) | Rottneest<br><i>OR</i><br>(95% CI) |
|----------------------|------------------------------|--------------------------------------|-------------------------------------|---------------------------------------------|-------------------------------------|------------------------------------|
| Male                 | -                            | -                                    | -                                   | -                                           | -                                   | -                                  |
| Female               | 1.5<br>(1.1 – 2.1)           | 1.7<br>(1.1 – 2.5)                   | 1.5<br>(1.1 – 2.0)                  | NS                                          | NS                                  | NS                                 |
| 16-29                | -                            | -                                    | -                                   | -                                           | -                                   | -                                  |
| 30-49                | NS                           | NS                                   | NS                                  | 1.6<br>(1.1-2.3)                            | 0.7<br>(0.6-1.0)                    | NS                                 |
| 50-69                | NS                           | NS                                   | NS                                  | 2.2<br>(1.5-3.3)                            | NS                                  | NS                                 |
| No Child<br>under 15 | -                            | -                                    | -                                   | -                                           | -                                   | -                                  |
| Child under<br>15    | NS                           | NS                                   | 1.9<br>(1.4 – 2.8)                  | 1.4<br>(1.0-1.9)                            | NS                                  | 1.3<br>(1.0-1.7)                   |
| Smoker               | -                            | -                                    | -                                   | -                                           | -                                   | -                                  |
| Ex-smoker            | 3.1<br>(2.0-4.4)             | NS                                   | 3.3<br>(2.3-4.8)                    | 2.4<br>(1.7-3.5)                            | 3.0<br>(2.2-4.1)                    | 3.2<br>(2.3-4.6)                   |
| Never-<br>smoked     | 7.2<br>(5.0 -10.3)           | 2.9<br>(1.8-4.6)                     | 7.1<br>(5.1-9.9)                    | 6.0<br>(4.3-8.4)                            | 5.6<br>(4.2-7.4)                    | 6.2<br>(4.6-8.4)                   |

1  
2  
3 Along with respondent characteristics, it is likely that venue attributes influenced support  
4  
5 levels. Table 3 lists various attributes of each outdoor location. Respondents were more  
6  
7 supportive of smoke free policies for venues that already had smoking restrictions in place,  
8  
9 were smaller in size, and had a family focus. In general, as venue size increased and the target  
10  
11 population attending the venues became more representative of the general public, support  
12  
13 weakened.  
14  
15  
16  
17  
18  
19

20  
21 Table 3: Support for outdoor smoking bans by venue and venue attributes

| Venue                                   | % support | Venue attributes |                                    |                                                   |                    |
|-----------------------------------------|-----------|------------------|------------------------------------|---------------------------------------------------|--------------------|
|                                         |           | Land size        | Family or general population focus | Smoke free policy status                          | Frequency of event |
| Zoo                                     | 85        | 41 acres         | Family                             | Smoking only permitted in dedicated smoking areas | Continual          |
| South Perth<br>Foreshore<br>Family Zone | 82        | 30 acres         | Family                             | Total smoking ban                                 | Annual             |
| Royal Show                              | 80        | 75 acres         | Family                             | Total smoking ban                                 | Annual             |
| Adventure world                         | 77        | 660 acres        | Family                             | Total smoking ban                                 | Summer only        |
| Kings Park                              | 52        | 1,003 acres      | General                            | No policy                                         | Continual          |
| Rottneest                               | 43        | 31,179 acres     | General                            | No policy                                         | Continual          |

## DISCUSSION

The present study investigated public attitudes to potential tobacco control policy extensions, namely plain packaging requirements and smoking bans at outdoor venues. In terms of community support for plain packaging, approximately half of the survey respondents supported the initiative and almost a quarter were neutral. Of note is that only one in three current smokers, who constitute 19% of the adult population, disagreed with the policy. This suggests that there is unlikely to be substantial public backlash when plain packaging is introduced in Australia.

As governments increasingly legislate against smoking in workplaces and other indoor locations, extension to outdoor contexts is the next frontier. Smoking bans in outdoor settings may have multiple benefits in terms of reducing non-smokers' exposure to second-hand smoke, encouraging smokers to reduce their intake or quit, and avoiding instances of adults modelling tobacco consumption to children.<sup>(23)</sup> However, there is a need to better understand community support for such policy extensions to optimise implementation and compliance. Reflecting the findings of limited previous work in this area,<sup>(18)</sup> the results of the present study show majority support for smoking bans at five of the six nominated venues. The one exception was an island resort that is large in acreage and patronised by both local residents and tourists. The tendency for support to be highest among venues that already have voluntary smoking bans in place is aligned with previous research suggesting that support for bans increases post-implementation.<sup>(16, 17)</sup>

Past research has found women to be generally more supportive of smoking policies than men.<sup>(6, 7, 19)</sup> In the present study, women tended to be more supportive of smoking bans in outdoor venues, but men were more supportive of plain packaging. More advanced age has

1  
2  
3 been associated with greater support for smoking policies elsewhere,(19) and this was found  
4  
5 to be the case for plain packaging and smoking bans at some of the nominated venues but not  
6  
7 all. It thus appears that demographic attributes may have varying relationships to support  
8  
9 levels in different national contexts, and that country-specific research needs to be undertaken  
10  
11 to assess likely reactions to policy changes among different population segments.  
12  
13

14  
15  
16 While this study demonstrated support for further tobacco control measures, it is important to  
17  
18 also consider the potential for unintended negative consequences. Chapman and Freeman  
19  
20 (2008) cautioned that the de-normalisation of smoking can stigmatise smokers, potentially  
21  
22 resulting in adverse outcomes such as under-reporting of smoking and reluctance to seek  
23  
24 medical assistance for smoking-related conditions.(24) Another issue is individuals' right to  
25  
26 autonomy, which may be compromised by ever-increasing smoking restrictions .(25)  
27  
28

29  
30 Smoking bans at outdoor venues may discourage smokers from attending community events,  
31  
32 which may in turn prevent children of smokers from accessing such events. Empirical  
33  
34 evidence is needed to determine the likelihood of these outcomes and to guide attempts to  
35  
36 ameliorate any unintended consequences. Fortunately, many smokers responding to this  
37  
38 survey were in favour of outdoor smoking bans, an outcome that may reflect their  
39  
40 appreciation of the added incentive for quitting provided by increased restrictions on  
41  
42 smoking.(6, 10)  
43  
44  
45  
46

47  
48 In conclusion, the results of the present study demonstrate community support for more  
49  
50 stringent tobacco control policies in Australia. This evidence may be of use to public policy  
51  
52 makers in their deliberations relating to future extensions of existing regulations. Further  
53  
54 research is needed in other countries to assess the extent to which the results reflect  
55  
56 prevailing community views in other locations.  
57  
58  
59  
60

**REFERENCES**

1. Freeman B, Gartner C, Hall W et al. Forecasting future tobacco control policy: where to next? *Aust N Z J Public Health* 2010;34(5):447-50.
2. Blake KD, Viswanath K, Blendon RJ et al. The role of tobacco-specific media exposure, knowledge, and smoking status on selected attitudes toward tobacco control. *Nicotine Tob Res* 2010;12(2):117-26.
3. Brown A, Boudreau C, Moodie C et al. Support for removal of point-of-purchase tobacco advertising and displays: findings from the International Tobacco Control (ITC) Canada survey. *TobControl* Published Online First: 15 October 2011. doi :10.1136 / tobaccocontrol-2011-050153
4. Edwards R, Thomson G, Wilson N et al. After the smoke has cleared: evaluation of the impact of a new national smoke-free law in New Zealand. *Tob Control* 2008;17(1):e2.
5. Gallus S, Rosato V, Zuccaro P et al. Attitudes towards the extension of smoking restrictions to selected outdoor areas in Italy. *Tob Control* 2011 Published Online First: 25 May 2011. doi:10.1136/tc.2010.040774
6. Hitchman SC, Fong GT, Zanna MP et al. Support and correlates of support for banning smoking in cars with children: findings from the ITC Four Country Survey. *Eur J Public Health* 2011;21(3):360-5.

- 1  
2  
3 7. Li Q, Hyland A, O'Connor R et al. Support for smoke-free policies among smokers  
4 and non-smokers in six cities in China: ITC China Survey. *Tob Control* 2010;19 Suppl 2:i40-  
5  
6  
7 6.  
8  
9  
10  
11  
12 8. Pacheco J. Trends-Public Opinion on Smoking and Anti-Smoking Policies. *Public*  
13  
14 *Opin Quart* 2011;75(3):576-92.  
15  
16  
17  
18 9. Wong G, Pawson R, Owen L. Policy guidance on threats to legislative interventions  
19 in public health: a realist synthesis. *BMC Public Health* 2011;11:222.  
20  
21  
22  
23  
24  
25 10. Francis JA, Abramsohn EM, Park HY. Policy-driven tobacco control. *Tob Control*  
26  
27 2010;19 Suppl 1:i16-20.  
28  
29  
30  
31  
32 11. Scollo M, Winstanley M. Tobacco in Australia: Facts and Issues. Melbourne: Cancer  
33  
34 Council Victoria. 2008.  
35  
36  
37  
38 12. Gallopel-Morvan K, Moodie C, Hammond D et al. Consumer perceptions of cigarette  
39 pack design in France: a comparison of regular, limited edition and plain packaging. *Tob*  
40  
41 *Control* Published Online First: 13 October 2011. doi:10.1136/tobaccocontrol-2011-050079  
42  
43  
44  
45  
46  
47 13. Moodie C, Mackintosh AM, Hastings G et al. Young adult smokers' perceptions of  
48 plain packaging: a pilot naturalistic study. *Tob Control* 2011 Sep;20(5):367-73.  
49  
50  
51  
52  
53  
54 14. Chapman S, Freeman B. From brand to bland--the demise of cigarette packaging.  
55  
56 *BMJ* 2011;343:d4376.  
57  
58  
59  
60



- 1  
2  
3  
4  
5 15. Freeman B. Tobacco plain packaging legislation: a content analysis of commentary  
6 posted on Australian online news. *Tob Control* 2011;20(5):361-6.  
7  
8  
9  
10  
11 16. Cooper J, Borland R, Yong HH et al. Compliance and support for bans on smoking in  
12 licensed venues in Australia: findings from the International Tobacco Control Four-Country  
13 Survey. *Aust N Z J Public Health* 2010;34(4):379-85.  
14  
15  
16  
17  
18  
19  
20 17. Borland R, Yong HH, Siahpush M et al. Support for and reported compliance with  
21 smoke-free restaurants and bars by smokers in four countries: findings from the International  
22 Tobacco Control (ITC) Four Country Survey. *Tob Control* 2006;15 Suppl 3:iii34-41.  
23  
24  
25  
26  
27  
28  
29 18. Thomson G, Wilson N, Edwards R. At the frontier of tobacco control: A brief review  
30 of public attitudes toward smoke-free outdoor places. *Nicotine Tob Res* 2009;11(6):584-90.  
31  
32  
33  
34  
35  
36 19. Doucet JM, Velicer WF, Laforge RG. Demographic differences in support for  
37 smoking policy interventions. *Addict Behav* 2007;32(1):148-57.  
38  
39  
40  
41  
42 20. Australian Bureau of Statistics. Smoking and risk behaviours in Australia, 2007-08.  
43 Catalogue No 4841.0. Canberra 2011.  
44  
45  
46  
47  
48  
49 21. Wood LJ, Rosenberg M, Clarkson J et al. Encouraging Young Western Australians to  
50 Be Smarter Than Smoking. *Am J Health Promot* 2009;23(6):403-11.  
51  
52  
53  
54  
55  
56  
57  
58  
59  
60

- 1  
2  
3 22. Australian Bureau of Statistics. CDATA01. Canberra, ACT: Australian Bureau of  
4  
5 Statistics2006.  
6  
7  
8  
9  
10 23. Thomson G, Wilson N, Edwards R et al. Should smoking in outside public spaces be  
11  
12 banned? Yes. *BMJ* 2008;11:337.  
13  
14  
15  
16 24. Chapman S, Freeman B. Markers of the denormalisation of smoking and the tobacco  
17  
18 industry. *Tob Control* [Review] 2008;17(1):25-31.  
19  
20  
21  
22  
23 25. Chapman S. Should smoking in outside public spaces be banned? No. *BMJ*  
24  
25 2008;337:a2804.  
26  
27  
28  
29  
30  
31

### 32 Funding

33 Supported by The Western Australian Health Promotion Foundation  
34  
35  
36  
37  
38

### 39 Data Sharing

40 Other than the results presented in the article, no additional data are available.  
41  
42  
43  
44

### 45 Competing Interests

46 None  
47  
48  
49  
50  
51

### 52 Contributorship

53  
54  
55  
56  
57  
58  
59  
60

1  
2  
3 All authors contributed substantially to the study. MR, LW, and RF conceptualised the design  
4 and implemented data collection. MR, RF, SP, and SH were involved in data analysis and  
5  
6 interpretation. All authors contributed to the literature review and writing of the article.  
7  
8  
9  
10  
11  
12  
13  
14  
15  
16  
17  
18  
19  
20  
21  
22  
23  
24  
25  
26  
27  
28  
29  
30  
31  
32  
33  
34  
35  
36  
37  
38  
39  
40  
41  
42  
43  
44  
45  
46  
47  
48  
49  
50  
51  
52  
53  
54  
55  
56  
57  
58  
59  
60

For peer review only

STROBE 2007 (v4) Statement—Checklist of items that should be included in reports of *cross-sectional studies*

| Section/Topic             | Item # | Recommendation                                                                                                                                                                       | Reported on page # |
|---------------------------|--------|--------------------------------------------------------------------------------------------------------------------------------------------------------------------------------------|--------------------|
| Title and abstract        | 1      | (a) Indicate the study’s design with a commonly used term in the title or the abstract                                                                                               | 1                  |
|                           |        | (b) Provide in the abstract an informative and balanced summary of what was done and what was found                                                                                  | 3                  |
| <b>Introduction</b>       |        |                                                                                                                                                                                      |                    |
| Background/rationale      | 2      | Explain the scientific background and rationale for the investigation being reported                                                                                                 | 4-5                |
| Objectives                | 3      | State specific objectives, including any prespecified hypotheses                                                                                                                     | 5                  |
| <b>Methods</b>            |        |                                                                                                                                                                                      |                    |
| Study design              | 4      | Present key elements of study design early in the paper                                                                                                                              | 6                  |
| Setting                   | 5      | Describe the setting, locations, and relevant dates, including periods of recruitment, exposure, follow-up, and data collection                                                      | 6                  |
| Participants              | 6      | (a) Give the eligibility criteria, and the sources and methods of selection of participants                                                                                          | 6                  |
| Variables                 | 7      | Clearly define all outcomes, exposures, predictors, potential confounders, and effect modifiers. Give diagnostic criteria, if applicable                                             | 6                  |
| Data sources/ measurement | 8*     | For each variable of interest, give sources of data and details of methods of assessment (measurement). Describe comparability of assessment methods if there is more than one group | 6                  |
| Bias                      | 9      | Describe any efforts to address potential sources of bias                                                                                                                            | n/a                |
| Study size                | 10     | Explain how the study size was arrived at                                                                                                                                            |                    |
| Quantitative variables    | 11     | Explain how quantitative variables were handled in the analyses. If applicable, describe which groupings were chosen and why                                                         | n/a                |
| Statistical methods       | 12     | (a) Describe all statistical methods, including those used to control for confounding                                                                                                | 7                  |
|                           |        | (b) Describe any methods used to examine subgroups and interactions                                                                                                                  | 7                  |
|                           |        | (c) Explain how missing data were addressed                                                                                                                                          | n/a                |
|                           |        | (d) If applicable, describe analytical methods taking account of sampling strategy                                                                                                   | 6-7                |
|                           |        | (e) Describe any sensitivity analyses                                                                                                                                                | n/a                |
| <b>Results</b>            |        |                                                                                                                                                                                      |                    |

|                          |     |                                                                                                                                                                                                              |         |
|--------------------------|-----|--------------------------------------------------------------------------------------------------------------------------------------------------------------------------------------------------------------|---------|
| Participants             | 13* | (a) Report numbers of individuals at each stage of study—eg numbers potentially eligible, examined for eligibility, confirmed eligible, included in the study, completing follow-up, and analysed            | 7       |
|                          |     | (b) Give reasons for non-participation at each stage                                                                                                                                                         | n/a     |
|                          |     | (c) Consider use of a flow diagram                                                                                                                                                                           | n/a     |
| Descriptive data         | 14* | (a) Give characteristics of study participants (eg demographic, clinical, social) and information on exposures and potential confounders                                                                     | 7-8     |
|                          |     | (b) Indicate number of participants with missing data for each variable of interest                                                                                                                          | n/a     |
| Outcome data             | 15* | Report numbers of outcome events or summary measures                                                                                                                                                         | 8-11    |
| Main results             | 16  | (a) Give unadjusted estimates and, if applicable, confounder-adjusted estimates and their precision (eg, 95% confidence interval). Make clear which confounders were adjusted for and why they were included | 7, 8-11 |
|                          |     | (b) Report category boundaries when continuous variables were categorized                                                                                                                                    | 8,10    |
|                          |     | (c) If relevant, consider translating estimates of relative risk into absolute risk for a meaningful time period                                                                                             | n/a     |
| Other analyses           | 17  | Report other analyses done—eg analyses of subgroups and interactions, and sensitivity analyses                                                                                                               | n/a     |
| <b>Discussion</b>        |     |                                                                                                                                                                                                              |         |
| Key results              | 18  | Summarise key results with reference to study objectives                                                                                                                                                     | 12      |
| Limitations              | 19  | Discuss limitations of the study, taking into account sources of potential bias or imprecision. Discuss both direction and magnitude of any potential bias                                                   | 2, 13   |
| Interpretation           | 20  | Give a cautious overall interpretation of results considering objectives, limitations, multiplicity of analyses, results from similar studies, and other relevant evidence                                   | 12-13   |
| Generalisability         | 21  | Discuss the generalisability (external validity) of the study results                                                                                                                                        | 13      |
| <b>Other information</b> |     |                                                                                                                                                                                                              |         |
| Funding                  | 22  | Give the source of funding and the role of the funders for the present study and, if applicable, for the original study on which the present article is based                                                | 7       |

\*Give information separately for cases and controls in case-control studies and, if applicable, for exposed and unexposed groups in cohort and cross-sectional studies.

**Note:** An Explanation and Elaboration article discusses each checklist item and gives methodological background and published examples of transparent reporting. The STROBE checklist is best used in conjunction with this article (freely available on the Web sites of PLoS Medicine at <http://www.plosmedicine.org/>, Annals of Internal Medicine at <http://www.annals.org/>, and Epidemiology at <http://www.epidem.com/>). Information on the STROBE Initiative is available at [www.strobe-statement.org](http://www.strobe-statement.org).

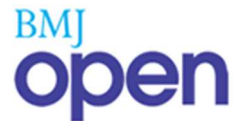

**Public support for tobacco control policy extensions in  
Western Australia: A cross-sectional study**

|                                 |                                                                                                                                                                                                                                                                                                                                                                                                                                                          |
|---------------------------------|----------------------------------------------------------------------------------------------------------------------------------------------------------------------------------------------------------------------------------------------------------------------------------------------------------------------------------------------------------------------------------------------------------------------------------------------------------|
| Journal:                        | <i>BMJ Open</i>                                                                                                                                                                                                                                                                                                                                                                                                                                          |
| Manuscript ID:                  | bmjopen-2011-000784.R1                                                                                                                                                                                                                                                                                                                                                                                                                                   |
| Article Type:                   | Research                                                                                                                                                                                                                                                                                                                                                                                                                                                 |
| Date Submitted by the Author:   | 01-Feb-2012                                                                                                                                                                                                                                                                                                                                                                                                                                              |
| Complete List of Authors:       | Rosenberg, Michael; University of Western Australia, Health Promotion Evaluation Unit<br>Pettigrew, Simone; University of Western Australia, Health Promotion Evaluation Unit<br>Wood, Lisa; University of Western Australia, School of Population Health<br>Ferguson, Renee; University of Western Australia, Health Promotion Evaluation Unit<br>Houghton, Stephen; University of Western Australia, Centre for Child and Adolescent Related Disorders |
| <b>Primary Subject Heading</b>: | Health policy                                                                                                                                                                                                                                                                                                                                                                                                                                            |
| Secondary Subject Heading:      | Smoking and tobacco                                                                                                                                                                                                                                                                                                                                                                                                                                      |
| Keywords:                       | Health policy < HEALTH SERVICES ADMINISTRATION & MANAGEMENT, PUBLIC HEALTH, Health & safety < HEALTH SERVICES ADMINISTRATION & MANAGEMENT                                                                                                                                                                                                                                                                                                                |
|                                 |                                                                                                                                                                                                                                                                                                                                                                                                                                                          |

SCHOLARONE™  
Manuscripts

only

STROBE 2007 (v4) Statement—Checklist of items that should be included in reports of *cross-sectional studies*

| Section/Topic                | Item # | Recommendation                                                                                                                                                                       | Reported on page # |
|------------------------------|--------|--------------------------------------------------------------------------------------------------------------------------------------------------------------------------------------|--------------------|
| Title and abstract           | 1      | (a) Indicate the study's design with a commonly used term in the title or the abstract                                                                                               | 1                  |
|                              |        | (b) Provide in the abstract an informative and balanced summary of what was done and what was found                                                                                  | 3                  |
| <b>Introduction</b>          |        |                                                                                                                                                                                      |                    |
| Background/rationale         | 2      | Explain the scientific background and rationale for the investigation being reported                                                                                                 | 4-5                |
| Objectives                   | 3      | State specific objectives, including any prespecified hypotheses                                                                                                                     | 5                  |
| <b>Methods</b>               |        |                                                                                                                                                                                      |                    |
| Study design                 | 4      | Present key elements of study design early in the paper                                                                                                                              | 6                  |
| Setting                      | 5      | Describe the setting, locations, and relevant dates, including periods of recruitment, exposure, follow-up, and data collection                                                      | 6                  |
| Participants                 | 6      | (a) Give the eligibility criteria, and the sources and methods of selection of participants                                                                                          | 6                  |
| Variables                    | 7      | Clearly define all outcomes, exposures, predictors, potential confounders, and effect modifiers. Give diagnostic criteria, if applicable                                             | 6                  |
| Data sources/<br>measurement | 8*     | For each variable of interest, give sources of data and details of methods of assessment (measurement). Describe comparability of assessment methods if there is more than one group | 6                  |
| Bias                         | 9      | Describe any efforts to address potential sources of bias                                                                                                                            | n/a                |
| Study size                   | 10     | Explain how the study size was arrived at                                                                                                                                            |                    |
| Quantitative variables       | 11     | Explain how quantitative variables were handled in the analyses. If applicable, describe which groupings were chosen and why                                                         | n/a                |
| Statistical methods          | 12     | (a) Describe all statistical methods, including those used to control for confounding                                                                                                | 7                  |
|                              |        | (b) Describe any methods used to examine subgroups and interactions                                                                                                                  | 7                  |
|                              |        | (c) Explain how missing data were addressed                                                                                                                                          | n/a                |
|                              |        | (d) If applicable, describe analytical methods taking account of sampling strategy                                                                                                   | 6-7                |
|                              |        | (e) Describe any sensitivity analyses                                                                                                                                                | n/a                |
| <b>Results</b>               |        |                                                                                                                                                                                      |                    |

|                          |     |                                                                                                                                                                                                              |         |
|--------------------------|-----|--------------------------------------------------------------------------------------------------------------------------------------------------------------------------------------------------------------|---------|
| Participants             | 13* | (a) Report numbers of individuals at each stage of study—eg numbers potentially eligible, examined for eligibility, confirmed eligible, included in the study, completing follow-up, and analysed            | 7       |
|                          |     | (b) Give reasons for non-participation at each stage                                                                                                                                                         | n/a     |
|                          |     | (c) Consider use of a flow diagram                                                                                                                                                                           | n/a     |
| Descriptive data         | 14* | (a) Give characteristics of study participants (eg demographic, clinical, social) and information on exposures and potential confounders                                                                     | 7-8     |
|                          |     | (b) Indicate number of participants with missing data for each variable of interest                                                                                                                          | n/a     |
| Outcome data             | 15* | Report numbers of outcome events or summary measures                                                                                                                                                         | 8-11    |
| Main results             | 16  | (a) Give unadjusted estimates and, if applicable, confounder-adjusted estimates and their precision (eg, 95% confidence interval). Make clear which confounders were adjusted for and why they were included | 7, 8-11 |
|                          |     | (b) Report category boundaries when continuous variables were categorized                                                                                                                                    | 8,10    |
|                          |     | (c) If relevant, consider translating estimates of relative risk into absolute risk for a meaningful time period                                                                                             | n/a     |
| Other analyses           | 17  | Report other analyses done—eg analyses of subgroups and interactions, and sensitivity analyses                                                                                                               | n/a     |
| <b>Discussion</b>        |     |                                                                                                                                                                                                              |         |
| Key results              | 18  | Summarise key results with reference to study objectives                                                                                                                                                     | 12      |
| Limitations              | 19  | Discuss limitations of the study, taking into account sources of potential bias or imprecision. Discuss both direction and magnitude of any potential bias                                                   | 2, 13   |
| Interpretation           | 20  | Give a cautious overall interpretation of results considering objectives, limitations, multiplicity of analyses, results from similar studies, and other relevant evidence                                   | 12-13   |
| Generalisability         | 21  | Discuss the generalisability (external validity) of the study results                                                                                                                                        | 13      |
| <b>Other information</b> |     |                                                                                                                                                                                                              |         |
| Funding                  | 22  | Give the source of funding and the role of the funders for the present study and, if applicable, for the original study on which the present article is based                                                | 7       |

\*Give information separately for cases and controls in case-control studies and, if applicable, for exposed and unexposed groups in cohort and cross-sectional studies.

**Note:** An Explanation and Elaboration article discusses each checklist item and gives methodological background and published examples of transparent reporting. The STROBE checklist is best used in conjunction with this article (freely available on the Web sites of PLoS Medicine at <http://www.plosmedicine.org/>, Annals of Internal Medicine at <http://www.annals.org/>, and Epidemiology at <http://www.epidem.com/>). Information on the STROBE Initiative is available at [www.strobe-statement.org](http://www.strobe-statement.org).



Public support for tobacco control policy extensions in Western Australia:  
A cross-sectional study

**Authors:**

Michael Rosenberg, Associate Professor  
Health Promotion Evaluation Unit, School of Sport Science, Exercise and Health  
The University of Western Australia  
M408, 35 Stirling Highway, Crawley WA 6009  
(e) michael.rosenberg@uwa.edu.au  
(t) 08 6488 4654  
(f) 08 6488 1039

Simone Pettigrew, Professor (**Corresponding author**)  
Health Promotion Evaluation Unit, School of Sport Science, Exercise and Health,  
The University of Western Australia  
M408, 35 Stirling Highway, Crawley WA 6009  
(e) michael.rosenberg@uwa.edu.au  
(t) 08 6488 4654  
(f) 08 6488 1039

Lisa Wood, Associate Professor  
Centre for the Built Environment and Health, School of Population Health,  
The University of Western Australia, Perth, Australia.

Renee Ferguson, Research Associate  
Health Promotion Evaluation Unit, School of Sport Science, Exercise and Health,  
The University of Western Australia, Perth, Australia.

Stephen Houghton, Winthrop Professor  
Centre for Child and Adolescent Related Disorders,  
The University of Western Australia, Perth, Australia.

**Keywords**

Smoking bans, open spaces, plain packaging, public support.

**Word Count**

2739

## Article Summary

### 1) Article Focus:

- This study assessed public support in Australia for progressive tobacco control policies in the form of plain packaging of cigarettes and smoking bans in outdoor locations.
- The results can inform policy makers' efforts to develop and implement new tobacco control policies.

### 2) Key Messages

- The majority of respondents were supportive or neutral towards the introduction of plain packaging. Around a quarter of all respondents and a third of smokers disagreed with the proposed policy.
- A majority of respondents supported smoking bans at a broad range of venues including parks, zoos, and community events. Support was strongest among parents and for smaller outdoor venues.
- The results indicate that new regulations relating to plain packaging and smoking bans in outdoor locations are likely to receive considerable public support.

### 3) Strengths and Limitations

- The large sample (n=2,005) and use of random digit dialling provide robust results relating to the likely responses of Western Australians to new tobacco control policies.
- Further research is needed in other countries to assess the extent to which the results reflect prevailing community views elsewhere.

## ABSTRACT

**Objectives:** Policy makers seeking to introduce new tobacco control measures need to anticipate community support to assist them in planning appropriate implementation strategies. This study assessed community support for plain packaging and smoking bans in outdoor locations in Australia.

**Design:** Analytical cross-sectional survey.

**Setting and participants:** 2,005 Western Australian adults participated in a computer-assisted telephone interview. Random household telephone numbers were used to obtain a representative sample.

**Outcome measures:** Support for plain packaging of cigarettes and smoking bans at outdoor venues by demographic characteristics

**Results:** Around half of the survey respondents supported plain packaging and almost a further quarter reported being neutral on the issue. Only one in three smokers disagreed with the introduction of a plain packaging policy. A majority of respondents supported smoking bans at five of the six nominated venues, with support being strongest among those with children under the age of 15 years. The venues with the highest levels of support were those where smoke-free policies had already been voluntarily introduced by the venue managers, where children were most likely to be in attendance, and that were more limited in size.

**Conclusion:** The study results demonstrate community support for new tobacco control policies. This evidence can be used by public policy makers in their deliberations relating to the introduction of more extensive tobacco control regulations.

## INTRODUCTION

Tobacco control policies to date have encompassed various elements including cessation assistance, taxation, restrictions on tobacco advertising and removal of point of sale displays, tobacco packaging regulations, and designation of non-smoking areas.(1) Most tobacco control policies have considerable public support across varying countries and among both smokers and non-smokers.(2-12) As the evidence base relating to the harms associated with second-hand smoke grows and tobacco consumption becomes increasingly de-normalised in many countries, some governments are stepping up their efforts to further discourage smoking at a population level.(13, 14) Two areas of possible tobacco control policy extension include plain packaging of cigarettes and smoking bans in outdoor locations.(1, 2, 14)

In line with work demonstrating that the visual characteristics of cigarette packages convey important information to consumers and influence their perceptions of the healthiness and desirability of the product (15), recent research indicates that plain packaging may reduce demand for cigarettes. In Australia, Wakefield and colleagues (16, 17) demonstrated that as branding symbolism is reduced on packages, associations of the types of people who would use the product and assessments of the appeal of the product become progressively more negative. Similarly, Hoek et al.'s (18) research with young adult smokers in New Zealand indicated that the brand information displayed on cigarette packages can be important for identity construction and communication for this age group, and hence that the minimisation of this information and the inclusion of more prominent health warnings can reduce the attraction of the product. Attitudinal research conducted in the US (19), Canada (20), the UK (15, 21), and France (22) has reached the same general conclusions.

1  
2  
3 In a world first, legislation has been passed in Australia that requires plain packaging to be  
4  
5 phased in on all cigarette packages during 2012.(23, 24) There has been considerable support  
6  
7 for plain packaging among key stakeholders, including public health advocates and the three  
8  
9 primary political parties.(1, 25) However, anecdotal evidence suggests that the issue is more  
10  
11 contentious among the general public, an outcome that is at least partly attributed to  
12  
13 concerted efforts by the tobacco industry to incite public opposition to the change.(25)  
14  
15 Research is therefore necessary to gauge levels of support for plain packaging to assist  
16  
17 governments in planning appropriate implementation strategies.  
18  
19

20  
21  
22  
23 Restrictions on smoking in public places have been found to be effective in terms of  
24  
25 achieving compliance among smokers and reducing exposure to second-hand smoke.(4) They  
26  
27 can also contribute to the prevention of smoking uptake among children and young people by  
28  
29 reshaping the perceived social acceptability of smoking.(26) The ability of smoke-free  
30  
31 policies to normalise non-smoking is evident in the dramatic increases in support for such  
32  
33 policies that have occurred in numerous countries post implementation. (4, 27-29) Of note is  
34  
35 that many of these policies have been introduced on the basis of research evidence despite  
36  
37 only minority support pre-implementation.  
38  
39

40  
41  
42  
43 While numerous countries have implemented smoking bans in workplaces, restaurants, and  
44  
45 bars,(27, 30) and in some cases the outdoor areas adjacent to these locations,(14) other  
46  
47 outdoor locations remain mostly unregulated. To date there appears to have been little  
48  
49 research on the extent of support for bans in outdoor locations characterised by open spaces  
50  
51 that are not directly adjacent to buildings. In their review of the few studies that have  
52  
53 explored this issue, Thomson, Wilson, and Edwards(31) noted that there are typically high  
54  
55  
56  
57  
58  
59  
60

1  
2  
3 levels of community support, but that further research is needed to more comprehensively  
4  
5 assess the extent of support for such bans and how this may vary in different contexts.(31)  
6  
7

8  
9  
10 While high levels of community support are not a prerequisite for successful policy  
11  
12 implementation due to the normalisation outcomes noted above, they are likely to be of value  
13  
14 in facilitating policies through the relevant legislative processes and minimising the costs  
15  
16 associated with community consultation and education. Evidence relating to levels of support  
17  
18 for new tobacco control policies is useful for informing governments of (i) the extent to  
19  
20 which legislative changes are aligned with community attitudes and (ii) any variations in  
21  
22 attitudes among different stakeholder groups. This information can assist in ensuring that new  
23  
24 policies are effectively communicated to enhance acceptance and compliance.(2, 32)  
25  
26

27 Awareness of public attitudes is particularly important in the context of sophisticated  
28  
29 lobbying and public relations activities by the tobacco industry (33) and the potential for  
30  
31 media coverage to influence support for tobacco control policies. (34, 35)  
32  
33  
34  
35

36 To this end, the present study investigated public support for plain packaging of cigarettes  
37  
38 and smoking bans at a range of outdoor venues. Australia, the context of the study, is  
39  
40 acknowledged to be one of the world leaders in tobacco control interventions.(6, 7, 30)  
41  
42

43 Attitudes to smoke-free policies have become more prevalent over the last decade,(14) and  
44  
45 the proportion of the adult population classified as current daily smokers has decreased to  
46  
47 19% nationally and 12% in Western Australia.(36, 37) These outcomes have been attributed  
48  
49 to ongoing public education campaigns and other tobacco control strategies implemented  
50  
51 since the 1970s.(14, 38, 39) The purpose of the study was to investigate whether the  
52  
53 population is amenable to further policy extensions.  
54  
55  
56  
57  
58  
59  
60

1  
2  
3 The study was funded by the Western Australian Health Promotion Foundation. Clearance  
4  
5 was obtained from the UWA Human Ethics Committee and no competing interests were  
6  
7 declared.  
8  
9

## 10 11 12 13 14 **METHOD**

### 15 16 **Sample and Survey Design**

17  
18 Data for this study were collected via a household telephone survey in November, 2010.

19  
20 Respondents were residents of Western Australia aged 18-69 years. Telephone numbers were  
21  
22 randomly selected from an electronic household telephone directory. Although the directory  
23  
24 included only landlines (i.e., mobile phone numbers are not listed), the rate of landline  
25  
26 ownership in Australia has remained high over the last decade at around 88%. (40) The adult  
27  
28 in the house with the next birthday was invited to participate in the survey. Up to 10 call  
29  
30 backs were made to each household to maximise the response rate, resulting in a response  
31  
32 rate of 60% amongst eligible households. The final sample comprised 2,005 respondents,  
33  
34 66% of whom resided in the Perth Metropolitan area and the remainder in country areas. To  
35  
36 adjust for any differences from the general population, the sample was weighted to the age  
37  
38 and location distribution of the Western Australian population aged 16-69 years according to  
39  
40 2006 census data.(41)  
41  
42  
43  
44  
45  
46

47  
48 The survey instrument comprised a range of questions relating to lifestyle and attitudes to  
49  
50 smoking. One item asked respondents whether they agreed, disagreed, or had no feelings  
51  
52 about the introduction of plain packaging on cigarettes. The Australian Government had  
53  
54 announced its intention to introduce plain packaging in April 2010,(25) and it was likely that  
55  
56 many respondents were aware of this at the time of the survey. Other survey items asked  
57  
58  
59  
60

1  
2  
3 respondents whether they supported, did not support, or had no feelings either way about  
4  
5 smoke-free policies in six outdoor venues: the Perth Zoo, the South Perth Foreshore Family  
6  
7 Zone (a riverfront venue for music festivals), the Perth Royal Show (an annual agricultural  
8  
9 event), Adventure World (a theme park), Kings Park (a national park located adjacent to the  
10  
11 city centre), and Rottnest Island (a holiday resort island located 20 kilometres from the  
12  
13 mainland). The purposefully selected venues represented a wide range of locations, including  
14  
15 some that had elected to be smoke free<sup>1</sup> and others that had no smoking policies at the time of  
16  
17 data collection. Some of the venues were family oriented, while others attracted the general  
18  
19 population. Some were permanent fixtures, while others were annual or seasonal events.  
20  
21 Almost all the venues, with the exception of the Royal Show, had an estimated 90% or more  
22  
23 open space within the venue boundaries. Table 1 provides a description of each of the venues  
24  
25 included in the study.  
26  
27  
28  
29  
30  
31

32 Data analysis comprised descriptive statistics to ascertain attitudes towards the two proposed  
33  
34 tobacco control policies. The Chi Square statistic was used to determine significant  
35  
36 association between policy support and participant characteristics (age, gender, smoking  
37  
38 status, and having a child under 15 years of age). Multinomial logistic regression models  
39  
40 were used to generate odds ratios for agreement/no agreement with the proposed policies,  
41  
42 adjusting for respondents who 'had no feelings either way' and the participant characteristics  
43  
44 explored in the descriptive analyses. All statistical analyses were performed using SPSS 19.0.  
45  
46  
47  
48  
49  
50  
51  
52  
53  
54  
55

---

56  
57 <sup>1</sup> These venues had recently received sponsorship funding from the Western Australian Health Promotion  
58 Foundation to facilitate the introduction of smoke-free policies.  
59  
60



Table 1: Venues and venue attributes

| Venue                             | Venue attributes |                                    |                                                   |                    |
|-----------------------------------|------------------|------------------------------------|---------------------------------------------------|--------------------|
|                                   | Land size        | Family or general population focus | Smoke-free policy status                          | Frequency of event |
| Zoo                               | 41 acres         | Family                             | Smoking only permitted in dedicated smoking areas | Continual          |
| South Perth Foreshore Family Zone | 30 acres         | Family                             | Total smoking ban                                 | Annual             |
| Royal Show                        | 75 acres         | Family                             | Total smoking ban                                 | Annual             |
| Adventure world                   | 660 acres        | Family                             | Total smoking ban                                 | Summer only        |
| Kings Park                        | 1,003 acres      | General                            | No policy                                         | Continual          |
| Rottnest                          | 31,179 acres     | General                            | No policy                                         | Continual          |

All authors contributed substantially to the study. MR, LW, and RF conceptualised the design and implemented data collection. MR, RF, SP, and SH were involved in data analysis and interpretation. All authors contributed to the literature review and writing of the article. Other than the results presented below, no additional data are available.

## RESULTS

The sample comprised 1,016 males (50.7%) and 989 females (49.3%), with 29.3% (n=588) aged 16-29 years, 42.0% (n=842) aged 30-49 years and 28.7% (n=575) aged 50-69 years.

Almost two-thirds of respondents (63.5%; n=1,273) had no children under 15 years of age, and around half (53.5%; n=1,073) had completed post-secondary education. The sample was

comprised of 12.3% (n=344) current smokers, 22.6% (n=473) ex-smokers, and 59% (n=1,189) who had never smoked. A significantly higher proportion of males than females were current smokers (21.9% vs 12.3%;  $p < 0.00$ ).

Table 2 shows the overall and sub-group levels of support for a plain packaging policy.

Around half the total sample were in agreement, a quarter disagreed, and a further quarter reported that they had no feelings either way. Agreement levels were lower among smokers, with approximately a third in agreement, a quarter neutral, and the remainder expressing disagreement. Non-smokers (including ex-smokers) were 2.7 times (95% CI; 2.0 – 3.6) more likely than smokers to agree, while smokers were 2.6 times (95% CI 1.9 – 3.6) more likely to have no feelings either way. Males were more likely than females to agree with plain packaging (53.3% vs 47.8%; OR = 1.4, 95% CI; 1.1 – 1.7) and less likely to have no feelings either way (21.3% vs 24.4%; OR = 0.9, 95% CI; 0.7 – 1.2). Compared with respondents aged 16-29 years (42.0%), respondents aged 50-69 years of age (55.1%) were 2.0 (95% CI; 1.5 – 2.7) times more likely to agree with the introduction of plain packaging.

Table 2: Support for plain packaging

|                        | Gender*                |                       |                        | Smoking Status**            |                           |                        | Children**                         |                                | Age**                       |                             |                             |
|------------------------|------------------------|-----------------------|------------------------|-----------------------------|---------------------------|------------------------|------------------------------------|--------------------------------|-----------------------------|-----------------------------|-----------------------------|
|                        | Total<br>(n=2005)<br>% | Male<br>(n=1016)<br>% | Female<br>(n=989)<br>% | Non-Smoker<br>(n=1189)<br>% | Ex-smoker<br>(n=472)<br>% | Smoker<br>(n=343)<br>% | No child under 15<br>(n=1273)<br>% | Child under 15<br>(n=732)<br>% | 16-29 Years<br>(n=575)<br>% | 35-49 Years<br>(n=842)<br>% | 50-69 Years<br>(n=588)<br>% |
| Agreed                 | 51                     | 53                    | 48                     | 55                          | 52                        | 34                     | 49                                 | 53                             | 55                          | 53                          | 42                          |
| Disagree               | 27                     | 25                    | 28                     | 25                          | 21                        | 38                     | 29                                 | 22                             | 23                          | 24                          | 35                          |
| No feelings either way | 23                     | 21                    | 24                     | 20                          | 26                        | 29                     | 22                                 | 25                             | 22                          | 23                          | 23                          |

\* Significant associations at the  $p < 0.05$  level

\*\* Significant associations at the  $p < 0.01$  level

As can be seen in Table 3, support for smoking bans was strong for four of the six specified outdoor locations. Those who had never smoked and those with children under 15 years of age demonstrated the highest levels of support for smoking bans at all six venues. Of note is that support was strong among smokers for some venues, especially the South Perth Foreshore and the Zoo.

Table 3: Support for outdoor smoking bans by venue and respondent characteristics

| Venue                                              | Total<br>(n=2005)<br>% | Male<br>(n=1016)<br>% | Female<br>(n=989)<br>% | Non-Smoker<br>(n=1189)<br>% | Ex-smoker<br>(n=472)<br>% | Smoker<br>(n=343)<br>% | No child under 15<br>(n=1273)<br>% | Child under 15<br>(n=732)<br>% |
|----------------------------------------------------|------------------------|-----------------------|------------------------|-----------------------------|---------------------------|------------------------|------------------------------------|--------------------------------|
| Perth Zoo <sup>a,b,c</sup>                         | 85                     | 81                    | 89                     | 90                          | 84                        | 68                     | 83                                 | 88                             |
| South Perth Foreshore Family Zone <sup>a,b,c</sup> | 82                     | 80                    | 84                     | 85                          | 82                        | 72                     | 80                                 | 85                             |
| Perth Royal Show <sup>b</sup>                      | 80                     | 77                    | 83                     | 96                          | 78                        | 60                     | 77                                 | 84                             |
| Adventure world theme park <sup>a,b,c</sup>        | 77                     | 74                    | 81                     | 83                          | 77                        | 58                     | 75                                 | 81                             |
| Kings Park <sup>b</sup>                            | 52                     | 52                    | 54                     | 62                          | 49                        | 26                     | 52                                 | 53                             |
| Rottneest Island <sup>b</sup>                      | 43                     | 42                    | 44                     | 51                          | 40                        | 19                     | 42                                 | 45                             |

Significant associations at the  $p < 0.01$  level for each venue are represented as “a” for gender, “b” for smoking status, and “c” for having a child under 15.

Table 4 provides the odds ratios for the variables of gender, age, parental status, and smoking status. Respondents’ smoking status was the strongest indicator of likely support, with significant and large differences in the odds ratios of ex-smokers and non-smokers compared with smokers for each of the venues. Independent of smoking status, females were more likely than males to support the Perth Zoo, the South Perth Foreshore, and the Perth Royal Show becoming smoke free venues. Independent of smoking status, gender had little impact on support for smoke free venues, with the exception of females who were 1.3 times more likely than males to support the Zoo being a non-smoking venue. Similarly, age was observed to have little independent effect on support for smoke free venues, with the exceptions of

Adventure World, where a smoking ban was supported significantly more by respondents aged 30+ years, and Kings Park, where respondents aged 30-49 years were less likely to support a smoking ban.

Table 4: Support for smoking bans at nominated outdoor venues

|                      | Zoo<br><i>OR</i><br>(95% <i>CI</i> ) | South Perth<br><i>OR</i><br>(95% <i>CI</i> ) | Royal Show<br><i>OR</i><br>(95% <i>CI</i> ) | Adventure<br>world<br><i>OR</i><br>(95% <i>CI</i> ) | Kings Park<br><i>OR</i><br>(95% <i>CI</i> ) | Rottneest<br><i>OR</i><br>(95% <i>CI</i> ) |
|----------------------|--------------------------------------|----------------------------------------------|---------------------------------------------|-----------------------------------------------------|---------------------------------------------|--------------------------------------------|
| Male                 | -                                    | -                                            | -                                           | -                                                   | -                                           | -                                          |
| Female               | 1.5<br>(1.1 – 2.1)                   | 1.7<br>(1.1 – 2.5)                           | 1.5<br>(1.1 – 2.0)                          | NS                                                  | NS                                          | NS                                         |
| 16-29                | -                                    | -                                            | -                                           | -                                                   | -                                           | -                                          |
| 30-49                | NS                                   | NS                                           | NS                                          | 1.6<br>(1.1-2.3)                                    | 0.7<br>(0.6-1.0)                            | NS                                         |
| 50-69                | NS                                   | NS                                           | NS                                          | 2.2<br>(1.5-3.3)                                    | NS                                          | NS                                         |
| No Child<br>under 15 | -                                    | -                                            | -                                           | -                                                   | -                                           | -                                          |
| Child under<br>15    | NS                                   | NS                                           | 1.9<br>(1.4 – 2.8)                          | 1.4<br>(1.0-1.9)                                    | NS                                          | 1.3<br>(1.0-1.7)                           |
| Smoker               | -                                    | -                                            | -                                           | -                                                   | -                                           | -                                          |
| Ex-smoker            | 3.1<br>(2.0-4.4)                     | NS                                           | 3.3<br>(2.3-4.8)                            | 2.4<br>(1.7-3.5)                                    | 3.0<br>(2.2-4.1)                            | 3.2<br>(2.3-4.6)                           |
| Never-<br>smoked     | 7.2<br>(5.0 -10.3)                   | 2.9<br>(1.8-4.6)                             | 7.1<br>(5.1-9.9)                            | 6.0<br>(4.3-8.4)                                    | 5.6<br>(4.2-7.4)                            | 6.2<br>(4.6-8.4)                           |

1  
2  
3 Respondents with children under 15 years of age were more likely than other respondents to  
4 support smoking bans at the South Perth Foreshore, the Royal Show, and Adventure World.  
5  
6 Females with children under 15 years of age were 1.6 (95% CI; 1.08 – 2.49) times more  
7  
8 likely than other females to support smoking bans at the Zoo. No significant independent  
9  
10 relationship was observed for parental status and support for the introduction of bans at Kings  
11  
12 Park, the Zoo, or the South Perth Foreshore.  
13  
14  
15  
16  
17

18 Along with respondent characteristics, it is likely that venue attributes influenced support  
19  
20 levels. Respondents were more supportive of smoke free policies for venues that already had  
21  
22 smoking restrictions in place, were smaller in size, and had a family focus. In general, as  
23  
24 venue size increased and the target population attending the venues became more  
25  
26 representative of the general public, support weakened.  
27  
28  
29  
30  
31

## 32 **DISCUSSION**

33  
34 The present study investigated public attitudes to potential tobacco control policy extensions,  
35  
36 namely plain packaging requirements and smoking bans at outdoor venues. In terms of  
37  
38 community support for plain packaging, approximately half of the survey respondents  
39  
40 supported the initiative and almost a quarter were neutral. This suggests that there is unlikely  
41  
42 to be a substantial public backlash when plain packaging is introduced in Australia. Of note is  
43  
44 that only one in three current smokers, who constitute 12% of the Western Australian adult  
45  
46 population, disagreed with the policy. In the light of a primary aim of plain packaging policy  
47  
48 being to discourage new adopters (14, 42), this may reflect high levels of regret for smoking  
49  
50 initiation among current smokers. (43, 44)  
51  
52  
53  
54  
55  
56  
57  
58  
59  
60

1  
2  
3 As governments increasingly legislate against smoking in workplaces and other indoor  
4 locations, extension to outdoor contexts is the next frontier. Smoking bans in outdoor settings  
5 may have multiple benefits in terms of reducing non-smokers' exposure to second-hand  
6 smoke, encouraging smokers to reduce their intake or quit, and avoiding instances of adults  
7 modelling and normalising tobacco consumption to children.(45) However, there is a need to  
8 better understand community support for such policy extensions to optimise implementation  
9 and compliance. Reflecting the findings of limited previous work in this area,(31) the results  
10 of the present study show majority support for smoking bans at five of the six nominated  
11 venues. The one exception was an island resort that is large in acreage and patronised by both  
12 local residents and tourists. The tendency for support to be highest among venues that already  
13 have voluntary smoking bans in place is aligned with previous research suggesting that  
14 support for bans increases post-implementation.(27, 28, 30)

15  
16  
17  
18  
19  
20  
21  
22  
23  
24  
25  
26  
27  
28  
29  
30  
31  
32 Past research has found women to be generally more supportive of smoking policies than  
33 men.(6, 7, 32) In the present study, women tended to be more supportive of smoking bans in  
34 outdoor venues, but men were more supportive of plain packaging. The reasons for women's  
35 lower support for plain packaging are not clear and would require further research to  
36 understand whether this outcome relates to weaker beliefs about the potential effectiveness of  
37 this approach or stronger involvement with brands per se.(46) More advanced age has been  
38 associated with greater support for smoking policies elsewhere,(32) and this was found to be  
39 the case for plain packaging and smoking bans at some of the nominated venues but not all. It  
40 thus appears that demographic attributes may have varying relationships to support levels in  
41 different national contexts, and that country-specific research needs to be undertaken to  
42 assess likely reactions to policy changes among different population segments.

1  
2  
3 Other areas of possible areas future research include (i) investigation of public support for  
4 plain packaging legislation once it has been fully implemented, (ii) analysis of venue  
5 management and community support for voluntary versus mandatory smoke-free policies in  
6 outdoor areas, and (iii) assessment of the impact of media coverage of proposed tobacco  
7 control policies on levels community support. In addition, further research analysing  
8 associations between smoke-free policies and children's normative beliefs about smoking  
9 (such as their estimates of peer or community prevalence and views on social acceptability)  
10 would be a valuable contribution to youth smoking prevention research.  
11  
12  
13  
14  
15  
16  
17  
18  
19  
20  
21  
22

23 Despite some variations in support for plain packaging and outdoor smoking bans by  
24 demographic characteristics, the overall levels of support for these policies suggest that it  
25 would not be necessary to differentially accommodate age and gender in communications  
26 strategies designed to educate the community about their introduction and implementation.  
27  
28 However, the large variations in support by smoking status indicate that smokers are a  
29 specific communications audience that may require special consideration. For example,  
30 information relating to the types of outdoor venues affected by any new smoke-free policy  
31 would need to be broadly disseminated to prevent smokers from arriving at these venues  
32 without being able to prepare for abstinence during attendance.  
33  
34  
35  
36  
37  
38  
39  
40  
41  
42  
43  
44

45 In conclusion, the results of the present study demonstrate community support for more  
46 stringent tobacco control policies in Australia. This evidence may be of use to public policy  
47 makers in their deliberations relating to future extensions of existing regulations. Further  
48 research is needed in other countries to assess the extent to which the results reflect  
49 prevailing community views in other locations.  
50  
51  
52  
53  
54  
55  
56  
57  
58  
59  
60

**Funding**

Supported by Health Promotion Foundation of Western Australia.

**Competing Interests**

None

**Contributorship statement**

All authors contributed substantially to the study. MR, LW, and RF conceptualised the design and implemented data collection. MR, RF, SP, and SH were involved in data analysis and interpretation. All authors contributed to the literature review and writing of the article.

**Data Sharing**

Other than the results presented in the paper, no additional data are available.



**REFERENCES**

1. Freeman B, Gartner C, Hall W et al. Forecasting future tobacco control policy: where to next? *Aust N Z J Public Health* 2010;34(5):447-50.
2. Blake KD, Viswanath K, Blendon RJ et al. The role of tobacco-specific media exposure, knowledge, and smoking status on selected attitudes toward tobacco control. *Nicotine Tob Res* 2010;12(2):117-26.
3. Brown A, Boudreau C, Moodie C et al. Support for removal of point-of-purchase tobacco advertising and displays: findings from the International Tobacco Control (ITC) Canada survey. *TobControl* Published Online First: 15 October 2011. doi :10.1136 / tobaccocontrol-2011-050153
4. Edwards R, Thomson G, Wilson N et al. After the smoke has cleared: evaluation of the impact of a new national smoke-free law in New Zealand. *Tob Control* 2008;17(1):e2.
5. Gallus S, Rosato V, Zuccaro P et al. Attitudes towards the extension of smoking restrictions to selected outdoor areas in Italy. *Tob Control* 2011 Published Online First: 25 May 2011. doi:10.1136/tc.2010.040774
6. Hitchman SC, Fong GT, Zanna MP et al. Support and correlates of support for banning smoking in cars with children: findings from the ITC Four Country Survey. *Eur J Public Health* 2011;21(3):360-5.

- 1  
2  
3 7. Li Q, Hyland A, O'Connor R et al. Support for smoke-free policies among smokers  
4 and non-smokers in six cities in China: ITC China Survey. *Tob Control* 2010;19 Suppl 2:i40-  
5  
6  
7 6.  
8  
9
- 10  
11 8. Pacheco J. Trends-Public Opinion on Smoking and Anti-Smoking Policies. *Public*  
12  
13 *Opin Quart* 2011;75(3):576-92.  
14  
15  
16  
17
- 18 9. Wong G, Pawson R, Owen L. Policy guidance on threats to legislative interventions  
19 in public health: a realist synthesis. *BMC Public Health* 2011;11:222.  
20  
21  
22  
23
- 24 10. Danishevski K, Gilmore A, McKee M. Public attitudes towards smoking and tobacco  
25 control policy in Russia. *Tob Control* 2008;17(4):276-83.  
26  
27  
28  
29
- 30 11. Gardner B, West R. Public support in England for raising the price of cigarettes to  
31 fund tobacco control activities. *Tob Control* 2010;19(4):331-3.  
32  
33  
34  
35  
36  
37
- 38 12. Wilson N, Weerasekera D, Edwards R et al. Characteristics of smoker support for  
39 increasing a dedicated tobacco tax: national survey data from New Zealand. *Nicotine Tob Res*  
40  
41  
42  
43 2010;12(2):168-73.  
44  
45  
46  
47
- 48 13. Francis JA, Abramsohn EM, Park HY. Policy-driven tobacco control. *Tob Control*  
49  
50 2010;19 Suppl 1:i16-20.  
51  
52  
53
- 54 14. Scollo M, Winstanley M. Tobacco in Australia: Facts and Issues. Melbourne: Cancer  
55  
56 Council Victoria. 2008.  
57  
58  
59  
60

- 1  
2  
3 15. Hammond D, Dockrell M, Arnott D et al. Cigarette pack design and perceptions of  
4 risk among UK adults and youth. *Eur J Public Health* 2009;19(6):631-7.  
5  
6  
7  
8  
9  
10 16. Wakefield MA, Germain D, Durkin SJ. How does increasingly plainer cigarette  
11 packaging influence adult smokers' perceptions about brand image? An experimental study.  
12 *Tob Control* 2008;17(6):416-21.  
13  
14  
15  
16  
17  
18 17. Germain D, Wakefield MA, Durkin SJ. Adolescents' perceptions of cigarette brand  
19 image: does plain packaging make a difference? *J Adolesc Health* 2010;46(4):385-92.  
20  
21  
22  
23  
24  
25 18. Hoek J, Gendall P, Gifford H et al. Tobacco Branding, Plain Packaging, Pictorial  
26 Warnings, and Symbolic Consumption. *Qual Health Res* 2011 Dec 27.  
27  
28  
29  
30  
31  
32 19. Thrasher JF, Rousu MC, Hammond D et al. Estimating the impact of pictorial health  
33 warnings and "plain" cigarette packaging: evidence from experimental auctions among adult  
34 smokers in the United States. *Health Policy* 2011;102(1):41-8.  
35  
36  
37  
38  
39  
40  
41 20. Doxey J, Hammond D. Deadly in pink: the impact of cigarette packaging among  
42 young women. *Tob Control* 2011;20(5):353-60.  
43  
44  
45  
46  
47 21. Moodie C, Mackintosh AM, Hastings G et al. Young adult smokers' perceptions of  
48 plain packaging: a pilot naturalistic study. *Tob Control* 2011;20(5):367-73.  
49  
50  
51  
52  
53  
54  
55  
56  
57  
58  
59  
60

- 1  
2  
3 22. Gallopel-Morvan K, Moodie C, Hammond D et al. Consumer perceptions of cigarette  
4 pack design in France: a comparison of regular, limited edition and plain packaging. *Tob*  
5  
6  
7 *Control* Published Online First: 13 October 2011. doi:10.1136/tobaccocontrol-2011-050079  
8  
9  
10  
11  
12 23. Chapman S, Freeman B. From brand to bland--the demise of cigarette packaging.  
13  
14 *BMJ* 2011;343:d4376.  
15  
16  
17  
18 24. Wakefield M. Welcome to cardboard country: how plain packaging could change the  
19  
20 subjective experience of smoking. *Tob Control* 2011;20(5):321-2.  
21  
22  
23  
24  
25 25. Freeman B. Tobacco plain packaging legislation: a content analysis of commentary  
26  
27 posted on Australian online news. *Tob Control* 2011;20(5):361-6.  
28  
29  
30  
31  
32 26. Smart RG, Stoduto G. Interventions by students in friends' alcohol, tobacco, and drug  
33  
34 use. *J Drug Educ* 1997;27(3):213-22.  
35  
36  
37  
38  
39 27. Cooper J, Borland R, Yong HH et al. Compliance and support for bans on smoking in  
40  
41 licensed venues in Australia: findings from the International Tobacco Control Four-Country  
42  
43 Survey. *Aust N Z J Public Health* 2010;34(4):379-85.  
44  
45  
46  
47 28. Fong GT, Hyland A, Borland R et al. Reductions in tobacco smoke pollution and  
48  
49 increases in support for smoke-free public places following the implementation of  
50  
51 comprehensive smoke-free workplace legislation in the Republic of Ireland: findings from  
52  
53 the ITC Ireland/UK Survey. *Tob Control* 2006;15 Suppl 3:iii51-8.  
54  
55  
56  
57  
58  
59  
60

- 1  
2  
3 29. Hyland A, Hassan LM, Higbee C et al. The impact of smokefree legislation in  
4  
5 Scotland: results from the Scottish ITC: Scotland/UK longitudinal surveys. *Eur J Public*  
6  
7 *Health* 2009;19(2):198-205.  
8  
9  
10  
11 30. Borland R, Yong HH, Siahpush M et al. Support for and reported compliance with  
12  
13 smoke-free restaurants and bars by smokers in four countries: findings from the International  
14  
15 Tobacco Control (ITC) Four Country Survey. *Tob Control* 2006;15 Suppl 3:iii34-41.  
16  
17  
18  
19  
20 31. Thomson G, Wilson N, Edwards R. At the frontier of tobacco control: A brief review  
21  
22 of public attitudes toward smoke-free outdoor places. *Nicotine Tob Res* 2009;11(6):584-90.  
23  
24  
25  
26  
27 32. Doucet JM, Velicer WF, Laforge RG. Demographic differences in support for  
28  
29 smoking policy interventions. *Addict Behav* 2007;32(1):148-57.  
30  
31  
32  
33 33. Davis RM, Wakefield M, Amos A et al. The Hitchhiker's Guide to Tobacco Control: a  
34  
35 global assessment of harms, remedies, and controversies. *Annu Rev Public Health*  
36  
37 2007;28:171-94.  
38  
39  
40  
41  
42 34. Nagelhout GE, van den Putte B, de Vries H et al. The influence of newspaper  
43  
44 coverage and a media campaign on smokers' support for smoke-free bars and restaurants and  
45  
46 on secondhand smoke harm awareness: findings from the International Tobacco Control  
47  
48 (ITC) Netherlands Survey. *Tob Control* 2012;21(1):24-9.  
49  
50  
51  
52  
53  
54  
55  
56  
57  
58  
59  
60

- 1  
2  
3 35. Harris JK, Shelton SC, Moreland-Russell S et al. Tobacco coverage in print media:  
4 the use of timing and themes by tobacco control supporters and opposition before a failed  
5 tobacco tax initiative. *Tob Control* 2010;19(1):37-43.  
6  
7  
8  
9  
10  
11 36. Australian Bureau of Statistics. Smoking and risk behaviours in Australia, 2007-08.  
12 Catalogue No 4841.0. Canberra2011.  
13  
14  
15  
16  
17  
18 37. Davis P, Joyce S. Health and Wellbeing of Adults in Western Australia 2010,  
19 Overview and Trends. Perth: Department of Health, Western Australia2011.  
20  
21  
22  
23  
24  
25 38. Wood LJ, Rosenberg M, Clarkson J et al. Encouraging Young Western Australians to  
26 Be Smarter Than Smoking. *Am J Health Promot* 2009;23(6):403-11.  
27  
28  
29  
30  
31  
32 39. Mitchell J, Rosenberg M, Wood L. Adolescents with attitude ... changes in views  
33 about smoking over time. *Health Promot J Austr* 2008;19(2):109-12.  
34  
35  
36  
37  
38 40. Australian Communications and Media Authority. Convergence and Communications  
39 Report 1: Australian household consumers' take-up and use of voice communications  
40 services. Canberra: Australian Communications and Media Authority 2012.  
41  
42  
43  
44  
45  
46  
47 41. Australian Bureau of Statistics. CDATEA01. Canberra, ACT: Australian Bureau of  
48 Statistics2006.  
49  
50  
51  
52  
53  
54  
55  
56  
57  
58  
59  
60

- 1  
2  
3 42. Munafo MR, Roberts N, Bauld L et al. Plain packaging increases visual attention to  
4 health warnings on cigarette packs in non-smokers and weekly smokers but not daily  
5 smokers. *Addiction* 2011;106(8):1505-10; discussion 11-2.  
6  
7  
8  
9  
10  
11  
12 43. Fong GT, Hammond D, Laux FL et al. The near-universal experience of regret among  
13 smokers in four countries: findings from the International Tobacco Control Policy Evaluation  
14 Survey. *Nicotine Tob Res* 2004;6 Suppl 3:S341-51.  
15  
16  
17  
18  
19  
20  
21 44. Wilson N, Edwards R, Weerasekera D. High levels of smoker regret by ethnicity and  
22 socioeconomic status: national survey data. *N Z Med J* 2009;3;122(1292):99-100.  
23  
24  
25  
26  
27 45. Thomson G, Wilson N, Edwards R et al. Should smoking in outside public spaces be  
28 banned? Yes. *BMJ* 2008;11:337.  
29  
30  
31  
32  
33  
34 46. Fournier S. Consumers and their brands: Developing relationship theory in consumer  
35 research. *Journal of Consumer Research*. 1998;24:343-73.  
36  
37  
38  
39  
40  
41  
42  
43  
44  
45  
46  
47  
48  
49  
50  
51  
52  
53  
54  
55  
56  
57  
58  
59  
60

1  
2  
3  
4  
5  
6  
7  
8 **Title: Public support for tobacco control policy extensions: A cross-sectional study**

Deleted: n analytical

9  
10  
11 **Authors:**

12  
13 Michael Rosenberg, Associate Professor  
14 Health Promotion Evaluation Unit, School of Sport Science, Exercise and Health  
15 The University of Western Australia  
16 M408, 35 Stirling Highway, Crawley WA 6009  
17 (e) michael.rosenberg@uwa.edu.au  
18 (t) 08 6488 4654  
19 (f) 08 6488 1039  
20

21 Simone Pettigrew, Professor (**Corresponding author**)  
22 Health Promotion Evaluation Unit, School of Sport Science, Exercise and Health,  
23 The University of Western Australia  
24 M408, 35 Stirling Highway, Crawley WA 6009  
25 (e) michael.rosenberg@uwa.edu.au  
26 (t) 08 6488 4654  
27 (f) 08 6488 1039  
28

29 Lisa Wood, Associate Professor  
30 Centre for the Built Environment and Health, School of Population Health,  
31 The University of Western Australia, Perth, Australia.  
32

33 Renee Ferguson, Research Associate  
34 Health Promotion Evaluation Unit, School of Sport Science, Exercise and Health,  
35 The University of Western Australia, Perth, Australia.  
36

37 Stephen Houghton, Winthrop Professor  
38 Centre for Child and Adolescent Related Disorders,  
39 The University of Western Australia, Perth, Australia.  
40  
41

42 **Keywords**

43  
44 Smoking bans, open spaces, plain packaging, public support.  
45  
46  
47

48 **Word Count**

49  
50 [2739](#)  
51  
52  
53  
54  
55  
56  
57  
58  
59  
60



## Article Summary

### 1) Article Focus:

- This study assessed public support in Australia for progressive tobacco control policies in the form of plain packaging of cigarettes and smoking bans in outdoor locations.
- The results can inform policy makers' efforts to develop and implement new tobacco control policies.

### 2) Key Messages

- The majority of respondents were supportive or neutral towards the introduction of plain packaging. Around a quarter of all respondents and a third of smokers disagreed with the proposed policy.
- A majority of respondents supported smoking bans at a broad range of venues including parks, zoos, and community events. Support was strongest among parents and for smaller outdoor venues.
- The results indicate that new regulations relating to plain packaging and smoking bans in outdoor locations are likely to receive considerable public support.

**Deleted:** the introduction of plain packaging. The majority was supportive or neutral on the issue.

### 3) Strengths and Limitations

- The large sample (n=2,005) and use of random digit dialling provide robust results relating to the likely responses of Western Australians to new tobacco control policies.
- Further research is needed in other countries to assess the extent to which the results reflect prevailing community views elsewhere.

**ABSTRACT**

**Objectives:** Policy makers seeking to introduce new tobacco control measures need to anticipate community support to assist them in planning appropriate implementation strategies. This study assessed community support for plain packaging and smoking bans in outdoor locations in Australia.

**Design:** Analytical cross-sectional survey.

**Setting and participants:** 2,005 Western Australian adults participated in a computer-assisted telephone interview. Random household telephone numbers were used to obtain a representative sample.

**Outcome measures:** Support for plain packaging of cigarettes and smoking bans at outdoor venues by demographic characteristics

**Results:** Around half of the survey respondents supported plain packaging and almost a further quarter reported being neutral on the issue. Only one in three smokers disagreed with the introduction of a plain packaging policy. A majority of respondents supported smoking bans at five of the six nominated venues, with support being strongest among those with children under the age of 15 years. The venues with the highest levels of support were those where smoke-free policies had already been voluntarily introduced by the venue managers, where children were most likely to be in attendance, and that were more limited in size.

**Conclusion:** The study results demonstrate community support for new tobacco control policies. This evidence can be used by public policy makers in their deliberations relating to the introduction of more extensive tobacco control regulations.

## INTRODUCTION

Tobacco control policies to date have encompassed various elements including cessation assistance, taxation, restrictions on tobacco advertising [and removal of point of sale displays](#), tobacco packaging regulations, and designation of non-smoking areas.(1) Most tobacco control policies have considerable public support across varying countries and among both smokers and non-smokers.(2-12) As the evidence base relating to the harms associated with second-hand smoke grows and tobacco consumption becomes increasingly de-normalised in many countries, some governments are stepping up their efforts to further discourage smoking at a population level.(13, 14) Two areas of possible tobacco control policy extension include plain packaging of cigarettes and smoking bans in outdoor locations.(1, 2, 14)

[In line with work demonstrating that the visual characteristics of cigarette packages convey important information to consumers and influence their perceptions of the healthiness and desirability of the product](#) (15), recent research indicates that plain packaging may reduce demand for cigarettes. [In Australia, Wakefield and colleagues](#) (16, 17) [demonstrated that as branding symbolism is reduced on packages, associations of the types of people who would use the product and assessments of the appeal of the product become progressively more negative. Similarly, Hoek et al.'s](#) (18) [research with young adult smokers in New Zealand indicated that the brand information displayed on cigarette packages can be important for identity construction and communication for this age group, and hence that the minimisation of this information and the inclusion of more prominent health warnings can reduce the attraction of the product. Attitudinal research conducted in the US](#) (19), [Canada](#) (20), [the UK](#) (15, 21), [and France](#) (22) [has reached the same general conclusions.](#)

1  
2  
3  
4  
5  
6  
7  
8 In a world first, legislation has been passed in Australia that requires plain packaging to be  
9  
10 phased in on all cigarette packages during 2012.(23, 24) There has been considerable support  
11  
12 for plain packaging among key stakeholders, including public health advocates and the three  
13  
14 primary political parties.(1, 25) However, anecdotal evidence suggests that the issue is more  
15  
16 contentious among the general public, an outcome that is at least partly attributed to  
17  
18 concerted efforts by the tobacco industry to incite public opposition to the change.(25)  
19  
20 Research is therefore necessary to gauge levels of support for plain packaging to assist  
21  
22 governments in planning appropriate implementation strategies.  
23  
24  
25

26 Restrictions on smoking in public places have been found to be effective in terms of  
27  
28 achieving compliance among smokers and reducing exposure to second-hand smoke.(4) They  
29  
30 can also contribute to the prevention of smoking uptake among children and young people by  
31  
32 reshaping the perceived social acceptability of smoking.(26) The ability of smoke-free  
33  
34 policies to normalise non-smoking, is evident in the dramatic increases in support for such  
35  
36 policies that have occurred in numerous countries post implementation. (4, 27-29) Of note is  
37  
38 that many of these policies have been introduced on the basis of research evidence despite  
39  
40 only minority support pre-implementation.  
41  
42  
43

**Deleted:** Bans can

**Deleted:** in certain locations in a relatively short period of time.

44 While numerous countries have implemented smoking bans in workplaces, restaurants, and  
45  
46 bars,(27, 30) and in some cases the outdoor areas adjacent to these locations,(14) other  
47  
48 outdoor locations remain mostly unregulated. To date there appears to have been little  
49  
50 research on the extent of support for bans in outdoor locations characterised by open spaces  
51  
52 that are not directly adjacent to buildings. In their review of the few studies that have  
53  
54 explored this issue, Thomson, Wilson, and Edwards(31) noted that there are typically high  
55  
56  
57  
58  
59  
60

1  
2  
3  
4  
5  
6  
7  
8 levels of community support, but that further research is needed to more comprehensively  
9 assess the extent of support for such bans and how this may vary in different contexts.(31)  
10  
11

12  
13  
14 While high levels of community support are not a prerequisite for successful policy  
15 implementation due to the normalisation outcomes noted above, they are likely to be of value  
16 in facilitating policies through the relevant legislative processes and minimising the costs  
17 associated with community consultation and education. Evidence relating to levels of support  
18 for new tobacco control policies is useful for informing governments of (i) the extent to  
19 which legislative changes are aligned with community attitudes and (ii) any variations in  
20 attitudes among different stakeholder groups. This information can assist in ensuring that new  
21 policies are effectively communicated to enhance acceptance and compliance.(2, 32)  
22  
23

**Deleted:** attempting to ensure that

**Deleted:** .(2, 9, 17) In addition, information relating to variations in attitudes among different stakeholder groups

24  
25  
26  
27  
28  
29  
30 Awareness of public attitudes is particularly important in the context of sophisticated  
31 lobbying and public relations activities by the tobacco industry (33) and the potential for  
32 media coverage to influence support for tobacco control policies. (34, 35)  
33  
34  
35  
36  
37

38 To this end, the present study investigated public support for plain packaging of cigarettes  
39 and smoking bans at a range of outdoor venues. Australia, the context of the study, is  
40 acknowledged to be one of the world leaders in tobacco control interventions.(6, 7, 30)  
41  
42

43  
44 Attitudes to smoke-free policies have become more prevalent over the last decade,(14) and  
45 the proportion of the adult population classified as current daily smokers has decreased to  
46 19% nationally and 12% in Western Australia.(36, 37) These outcomes have been attributed  
47 to ongoing public education campaigns and other tobacco control strategies implemented  
48 since the 1970s.(14, 38, 39) The purpose of the study was to investigate whether the  
49 population is amenable to further policy extensions.  
50  
51  
52  
53  
54  
55  
56  
57  
58  
59  
60

**Deleted:** nti-smoking a

**Deleted:**

**Deleted:** regular

**Deleted:** current daily

1  
2  
3  
4  
5  
6  
7  
8 The study was funded by the Western Australian Health Promotion Foundation. Clearance  
9  
10 was obtained from the UWA Human Ethics Committee and no competing interests were  
11  
12 declared.

Deleted: The study received

Deleted: c

Deleted: there were

Deleted: to

## 17 METHOD

### 18 Sample and Survey Design

19 Data for this study were collected via a household telephone survey in November, 2010.

20 Respondents were residents of Western Australia aged 18-69 years. Telephone numbers were

21 randomly selected from an electronic household telephone directory. Although the directory

22 included only landlines (i.e., mobile phone numbers are not listed), the rate of landline

23 ownership in Australia has remained high over the last decade at around 88%. (40) The adult

24 in the house with the next birthday was invited to participate in the survey. Up to 10 call

25 backs were made to each household to maximise the response rate, resulting in a response

26 rate of 60% amongst eligible households. The final sample comprised 2,005 respondents,

27 66% of whom resided in the Perth Metropolitan area and the remainder in country areas. To

28 adjust for any differences from the general population, the sample was weighted to the age

29 and location distribution of the Western Australian population aged 16-69 years according to

30 2006 census data.(41)

31 The survey instrument comprised a range of questions relating to lifestyle and attitudes to

32 smoking. One item asked respondents whether they agreed, disagreed, or had no feelings

33 about the introduction of plain packaging on cigarettes. The Australian Government had

34 announced its intention to introduce plain packaging in April 2010,(25) and it was likely that

35 many respondents were aware of this at the time of the survey. Other survey items asked

1  
2  
3  
4  
5  
6  
7  
8 respondents whether they supported, did not support, or had no feelings either way about  
9  
10 smoke-free policies in six outdoor venues: the Perth Zoo, the South Perth Foreshore Family  
11  
12 Zone (a riverfront venue for music festivals), the Perth Royal Show (an annual agricultural  
13  
14 event), Adventure World (a theme park), Kings Park (a national park located adjacent to the  
15  
16 city centre), and Rottnest Island (a holiday resort island located 20 kilometres from the  
17  
18 mainland). The purposefully selected venues represented a wide range of locations, including  
19  
20 some that had elected to be smoke free<sup>1</sup> and others that had no smoking policies at the time of  
21  
22 data collection. Some of the venues were family oriented, while others attracted the general  
23  
24 population. Some were permanent fixtures, while others were annual or seasonal events.

25  
26 Almost all the venues, with the exception of the Royal Show, had an estimated 90% or more  
27  
28 open space within the venue boundaries. Table 1 provides a description of each of the venues  
29  
30 included in the study.  
31  
32

33  
34 Data analysis comprised descriptive statistics to ascertain attitudes towards the two proposed  
35  
36 tobacco control policies. The Chi Square statistic was used to determine significant  
37  
38 association between policy support and participant characteristics (age, gender, smoking  
39  
40 status, and having a child under 15 years of age). Multinomial logistic regression models  
41  
42 were used to generate odds ratios for agreement/no agreement with the proposed policies,  
43  
44 adjusting for respondents who 'had no feelings either way' and the participant characteristics  
45  
46 explored in the descriptive analyses. All statistical analyses were performed using SPSS 19.0.  
47  
48  
49  
50  
51  
52  
53  
54  
55

56  
57 <sup>1</sup> These venues had recently received sponsorship funding from the Western Australian Health Promotion  
58  
59 Foundation to facilitate the introduction of smoke-free policies.  
60

Table 1: Venues and venue attributes

| <u>Venue</u>                             | <u>Venue attributes</u> |                                           |                                                          |                           |
|------------------------------------------|-------------------------|-------------------------------------------|----------------------------------------------------------|---------------------------|
|                                          | <u>Land size</u>        | <u>Family or general population focus</u> | <u>Smoke-free policy status</u>                          | <u>Frequency of event</u> |
| <u>Zoo</u>                               | <u>41 acres</u>         | <u>Family</u>                             | <u>Smoking only permitted in dedicated smoking areas</u> | <u>Continual</u>          |
| <u>South Perth Foreshore Family Zone</u> | <u>30 acres</u>         | <u>Family</u>                             | <u>Total smoking ban</u>                                 | <u>Annual</u>             |
| <u>Royal Show</u>                        | <u>75 acres</u>         | <u>Family</u>                             | <u>Total smoking ban</u>                                 | <u>Annual</u>             |
| <u>Adventure world</u>                   | <u>660 acres</u>        | <u>Family</u>                             | <u>Total smoking ban</u>                                 | <u>Summer only</u>        |
| <u>Kings Park</u>                        | <u>1,003 acres</u>      | <u>General</u>                            | <u>No policy</u>                                         | <u>Continual</u>          |
| <u>Rottneat</u>                          | <u>31,179 acres</u>     | <u>General</u>                            | <u>No policy</u>                                         | <u>Continual</u>          |

All authors contributed substantially to the study. MR, LW, and RF conceptualised the design and implemented data collection. MR, RF, SP, and SH were involved in data analysis and interpretation. All authors contributed to the literature review and writing of the article. Other than the results presented below, no additional data are available.

**Deleted: Statistical Analyses**

The study was funded by the Western Australian Health Promotion Foundation.

## RESULTS

The sample comprised 1,016 males (50.7%) and 989 females (49.3%), with 29.3% (n=588) aged 16-29 years, 42.0% (n=842) aged 30-49 years and 28.7% (n=575) aged 50-69 years.

Almost two-thirds of respondents (63.5%; n=1,273) had no children under 15 years of age, and around half (53.5%; n=1,073) had completed post-secondary education. The sample was



comprised of 12.3% (n=344) current smokers, 22.6% (n=473) ex-smokers, and 59% (n=1,189) who had never smoked. A significantly higher proportion of males than females were current smokers (21.9% vs 12.3%;  $p < 0.00$ ).

- Deleted: C
- Deleted: comprised 12.3% (n=344) of the sample,
- Deleted: 22.6% (n=473)
- Deleted: those
- Deleted: 59% (n=1,189)
- Formatted: Font: Italic

Table 2 shows the overall and sub-group levels of support for a plain packaging policy. Around half the total sample were in agreement, a quarter disagreed, and a further quarter reported that they had no feelings either way. Agreement levels were lower among smokers, with approximately a third in agreement, a quarter neutral, and the remainder expressing disagreement. Non-smokers (including ex-smokers) were 2.7 times (95% CI; 2.0 – 3.6) more likely than smokers to agree, while smokers were 2.6 times (95% CI 1.9 – 3.6) more likely to have no feelings either way. Males were more likely than females to agree with plain packaging (53.3% vs 47.8%; OR = 1.4, 95% CI; 1.1 – 1.7) and less likely to have no feelings either way (21.3% vs 24.4%; OR = 0.9, 95% CI; 0.7 – 1.2). Compared with respondents aged 16-29 years (42.0%), respondents aged 50-69 years of age (55.1%) were 2.0 (95% CI; 1.5 – 2.7) times more likely to agree with the introduction of plain packaging.

- Deleted: When asked about their support for the introduction of plain packaging, 50.6% (n=1,015) of respondents agreed with the initiative, 26.6% (n=533) disagreed, and 22.8% (n=457)
- Deleted: Approximately one-third of current smokers (33.7%; n = 116) agreed with the introduction of plain packaging, 37.8% (n=130) disagreed, and 28.5% (n=98) were neutral.

Table 2: Support for plain packaging

|                        | Gender*  |          |         | Smoking Status** |           |         | Children**        |                | Age**       |             |             |
|------------------------|----------|----------|---------|------------------|-----------|---------|-------------------|----------------|-------------|-------------|-------------|
|                        | Total    | Male     | Female  | Non-Smoker       | Ex-smoker | Smoker  | No child under 15 | Child under 15 | 16-29 Years | 35-49 Years | 50-69 Years |
|                        | (n=2005) | (n=1016) | (n=989) | (n=1189)         | (n=472)   | (n=343) | (n=1273)          | (n=732)        | (n=575)     | (n=842)     | (n=588)     |
|                        | %        | %        | %       | %                | %         | %       | %                 | %              | %           | %           | %           |
| Agreed                 | 51       | 53       | 48      | 55               | 52        | 34      | 49                | 53             | 55          | 53          | 42          |
| Disagree               | 27       | 25       | 28      | 25               | 21        | 38      | 29                | 22             | 23          | 24          | 35          |
| No feelings either way | 23       | 21       | 24      | 20               | 26        | 29      | 22                | 25             | 22          | 23          | 23          |

\* Significant associations at the  $p < 0.05$  level  
 \*\* Significant associations at the  $p < 0.01$  level

As can be seen in Table 3, support for smoking bans was strong for four of the six specified outdoor locations. Those who had never smoked and those with children under 15 years of age demonstrated the highest levels of support for smoking bans at all six venues. Of note is that support was strong among smokers for some venues, especially the South Perth Foreshore and the Zoo.

Deleted: ¶

Deleted: ¶

Table 3: Support for outdoor smoking bans by venue and respondent characteristics

Deleted: ¶

| Venue                                              | Total<br>(n=2005)<br>% | Male<br>(n=1016)<br>% | Female<br>(n=989)<br>% | Non-Smoker<br>(n=1189)<br>% | Ex-smoker<br>(n=472)<br>% | Smoker<br>(n=343)<br>% | No child under 15<br>(n=1273)<br>% | Child under 15<br>(n=732)<br>% |
|----------------------------------------------------|------------------------|-----------------------|------------------------|-----------------------------|---------------------------|------------------------|------------------------------------|--------------------------------|
| Perth Zoo <sup>a,b,c</sup>                         | 85                     | 81                    | 89                     | 90                          | 84                        | 68                     | 83                                 | 88                             |
| South Perth Foreshore Family Zone <sup>a,b,c</sup> | 82                     | 80                    | 84                     | 85                          | 82                        | 72                     | 80                                 | 85                             |
| Perth Royal Show <sup>b</sup>                      | 80                     | 77                    | 83                     | 96                          | 78                        | 60                     | 77                                 | 84                             |
| Adventure world theme park <sup>a,b,c</sup>        | 77                     | 74                    | 81                     | 83                          | 77                        | 58                     | 75                                 | 81                             |
| Kings Park <sup>b</sup>                            | 52                     | 52                    | 54                     | 62                          | 49                        | 26                     | 52                                 | 53                             |
| Rottneest Island <sup>b</sup>                      | 43                     | 42                    | 44                     | 51                          | 40                        | 19                     | 42                                 | 45                             |

Significant associations at the  $p < 0.01$  level for each venue are represented as “a” for gender, “b” for smoking status, and “c” for having a child under 15.

Formatted: Font: Italic

Table 4 provides the odds ratios for the variables of gender, age, parental status, and smoking status. Respondents’ smoking status was the strongest indicator of likely support, with significant and large differences in the odds ratios of ex-smokers and non-smokers compared with smokers for each of the venues. Independent of smoking status, females were more likely than males to support the Perth Zoo, the South Perth Foreshore, and the Perth Royal Show becoming smoke free venues. Independent of smoking status, gender had little impact on support for smoke free venues, with the exception of females who were 1.3 times more likely than males to support the Zoo being a non-smoking venue. Similarly, age was observed to have little independent effect on support for smoke free venues, with the exceptions of

Deleted: ¶

Adventure World, where a smoking ban was supported significantly more by respondents aged 30+ years, and Kings Park, where respondents aged 30-49 years were less likely to support a smoking ban.

Table 4: Support for smoking bans at nominated outdoor venues

Deleted: 2

|                      | Zoo<br><i>OR</i><br>(95% CI) | South Perth<br><i>OR</i><br>(95% CI) | Royal Show<br><i>OR</i><br>(95% CI) | Adventure<br>world<br><i>OR</i><br>(95% CI) | Kings Park<br><i>OR</i><br>(95% CI) | Rottnest<br><i>OR</i><br>(95% CI) |
|----------------------|------------------------------|--------------------------------------|-------------------------------------|---------------------------------------------|-------------------------------------|-----------------------------------|
| Male                 | -                            | -                                    | -                                   | -                                           | -                                   | -                                 |
| Female               | 1.5<br>(1.1 – 2.1)           | 1.7<br>(1.1 – 2.5)                   | 1.5<br>(1.1 – 2.0)                  | NS                                          | NS                                  | NS                                |
| 16-29                | -                            | -                                    | -                                   | -                                           | -                                   | -                                 |
| 30-49                | NS                           | NS                                   | NS                                  | 1.6<br>(1.1-2.3)                            | 0.7<br>(0.6-1.0)                    | NS                                |
| 50-69                | NS                           | NS                                   | NS                                  | 2.2<br>(1.5-3.3)                            | NS                                  | NS                                |
| No Child<br>under 15 | -                            | -                                    | -                                   | -                                           | -                                   | -                                 |
| Child under<br>15    | NS                           | NS                                   | 1.9<br>(1.4 – 2.8)                  | 1.4<br>(1.0-1.9)                            | NS                                  | 1.3<br>(1.0-1.7)                  |
| Smoker               | -                            | -                                    | -                                   | -                                           | -                                   | -                                 |
| Ex-smoker            | 3.1<br>(2.0-4.4)             | NS                                   | 3.3<br>(2.3-4.8)                    | 2.4<br>(1.7-3.5)                            | 3.0<br>(2.2-4.1)                    | 3.2<br>(2.3-4.6)                  |
| Never-<br>smoked     | 7.2<br>(5.0 -10.3)           | 2.9<br>(1.8-4.6)                     | 7.1<br>(5.1-9.9)                    | 6.0<br>(4.3-8.4)                            | 5.6<br>(4.2-7.4)                    | 6.2<br>(4.6-8.4)                  |

1  
2  
3  
4  
5  
6  
7  
8 Respondents with children under 15 years of age were more likely than other respondents to  
9 support smoking bans at the South Perth Foreshore, the Royal Show, and Adventure World.  
10  
11 Females with children under 15 years of age were 1.6 (95% CI; 1.08 – 2.49) times more  
12 likely than other females to support smoking bans at the Zoo. No significant independent  
13 relationship was observed for parental status and support for the introduction of bans at Kings  
14 Park, the Zoo, or the South Perth Foreshore.  
15  
16  
17  
18  
19  
20  
21

22 Along with respondent characteristics, it is likely that venue attributes influenced support  
23 levels. Respondents were more supportive of smoke free policies for venues that already had  
24 smoking restrictions in place, were smaller in size, and had a family focus. In general, as  
25 venue size increased and the target population attending the venues became more  
26 representative of the general public, support weakened.  
27  
28  
29  
30  
31  
32

**Deleted:** Table 3 lists various attributes of each outdoor location.

### 33 34 **DISCUSSION**

35 The present study investigated public attitudes to potential tobacco control policy extensions,  
36 namely plain packaging requirements and smoking bans at outdoor venues. In terms of  
37 community support for plain packaging, approximately half of the survey respondents  
38 supported the initiative and almost a quarter were neutral. This suggests that there is unlikely  
39 to be a substantial public backlash when plain packaging is introduced in Australia. Of note is  
40 that only one in three current smokers, who constitute 12% of the Western Australian adult  
41 population, disagreed with the policy. In the light of a primary aim of plain packaging policy  
42 being to discourage new adopters (14, 42), this may reflect high levels of regret for smoking  
43 initiation among current smokers. (43, 44)  
44  
45  
46  
47  
48  
49  
50  
51  
52  
53  
54  
55  
56  
57  
58  
59  
60

**Deleted:** Table 3: Support for outdoor smoking bans by venue and venue attributes†  
Venue

**Deleted:** 19% of the

1  
2  
3  
4  
5  
6  
7  
8 As governments increasingly legislate against smoking in workplaces and other indoor  
9 locations, extension to outdoor contexts is the next frontier. Smoking bans in outdoor settings  
10 may have multiple benefits in terms of reducing non-smokers' exposure to second-hand  
11 smoke, encouraging smokers to reduce their intake or quit, and avoiding instances of adults  
12 modelling and normalising tobacco consumption to children.(45) However, there is a need to  
13  
14 better understand community support for such policy extensions to optimise implementation  
15 and compliance. Reflecting the findings of limited previous work in this area,(31) the results  
16 of the present study show majority support for smoking bans at five of the six nominated  
17 venues. The one exception was an island resort that is large in acreage and patronised by both  
18 local residents and tourists. The tendency for support to be highest among venues that already  
19 have voluntary smoking bans in place is aligned with previous research suggesting that  
20 support for bans increases post-implementation.(27, 28, 30)  
21  
22  
23  
24  
25  
26  
27  
28  
29  
30  
31  
32

33  
34 Past research has found women to be generally more supportive of smoking policies than  
35 men.(6, 7, 32) In the present study, women tended to be more supportive of smoking bans in  
36 outdoor venues, but men were more supportive of plain packaging. The reasons for women's  
37 lower support for plain packaging are not clear and would require further research to  
38 understand whether this outcome relates to weaker beliefs about the potential effectiveness of  
39 this approach or stronger involvement with brands per se.(46) More advanced age has been  
40 associated with greater support for smoking policies elsewhere,(32) and this was found to be  
41 the case for plain packaging and smoking bans at some of the nominated venues but not all. It  
42 thus appears that demographic attributes may have varying relationships to support levels in  
43 different national contexts, and that country-specific research needs to be undertaken to  
44 assess likely reactions to policy changes among different population segments.  
45  
46  
47  
48  
49  
50  
51  
52  
53  
54  
55  
56  
57  
58  
59  
60

1  
2  
3  
4  
5  
6  
7  
8 Other areas of possible areas future research include (i) investigation of public support for  
9 plain packaging legislation once it has been fully implemented, (ii) analysis of venue  
10 management and community support for voluntary versus mandatory smoke-free policies in  
11 outdoor areas, and (iii) assessment of the impact of media coverage of proposed tobacco  
12 control policies on levels community support. In addition, further research analysing  
13 associations between smoke-free policies and children's normative beliefs about smoking  
14 (such as their estimates of peer or community prevalence and views on social acceptability)  
15 would be a valuable contribution to youth smoking prevention research.

16  
17  
18  
19  
20  
21  
22  
23  
24  
25  
26 Despite some variations in support for plain packaging and outdoor smoking bans by  
27 demographic characteristics, the overall levels of support for these policies suggest that it  
28 would not be necessary to differentially accommodate age and gender in communications  
29 strategies designed to educate the community about their introduction and implementation.  
30  
31 However, the large variations in support by smoking status indicate that smokers are a  
32 specific communications audience that may require special consideration. For example,  
33 information relating to the types of outdoor venues affected by any new smoke-free policy  
34 would need to be broadly disseminated to prevent smokers from arriving at these venues  
35 without being able to prepare for abstinence during attendance.

36  
37  
38  
39  
40  
41  
42  
43  
44  
45  
46 In conclusion, the results of the present study demonstrate community support for more  
47 stringent tobacco control policies in Australia. This evidence may be of use to public policy  
48 makers in their deliberations relating to future extensions of existing regulations. Further  
49 research is needed in other countries to assess the extent to which the results reflect  
50 prevailing community views in other locations.  
51  
52  
53  
54  
55  
56  
57  
58  
59  
60

**Deleted:**

¶  
¶ While this study demonstrated support for further tobacco control measures, it is important to also consider the potential for unintended negative consequences. Chapman and Freeman (2008) cautioned that the de-normalisation of smoking can stigmatise smokers, potentially resulting in adverse outcomes such as under-reporting of smoking and reluctance to seek medical assistance for smoking-related conditions.(24) Another issue is individuals' right to autonomy, which may be compromised by ever-increasing smoking restrictions .(25) Smoking bans at outdoor venues may discourage smokers from attending community events, which may in turn prevent children of smokers from accessing such events. Empirical evidence is needed to determine the likelihood of these outcomes and to guide attempts to ameliorate any unintended consequences. Fortunately, many smokers responding to this survey were in favour of outdoor smoking bans, an outcome that may reflect their appreciation of the added incentive for quitting provided by increased restrictions on smoking.(6, 10)¶

## REFERENCES

1. Freeman B, Gartner C, Hall W et al. Forecasting future tobacco control policy: where to next? *Aust N Z J Public Health* 2010;34(5):447-50.
2. Blake KD, Viswanath K, Blendon RJ et al. The role of tobacco-specific media exposure, knowledge, and smoking status on selected attitudes toward tobacco control. *Nicotine Tob Res* 2010;12(2):117-26.
3. Brown A, Boudreau C, Moodie C et al. Support for removal of point-of-purchase tobacco advertising and displays: findings from the International Tobacco Control (ITC) Canada survey. *TobControl* Published Online First: 15 October 2011. doi :10.1136 / tobaccocontrol-2011-050153
4. Edwards R, Thomson G, Wilson N et al. After the smoke has cleared: evaluation of the impact of a new national smoke-free law in New Zealand. *Tob Control* 2008;17(1):e2.
5. Gallus S, Rosato V, Zuccaro P et al. Attitudes towards the extension of smoking restrictions to selected outdoor areas in Italy. *Tob Control* 2011 Published Online First: 25 May 2011. doi:10.1136/tc.2010.040774
6. Hitchman SC, Fong GT, Zanna MP et al. Support and correlates of support for banning smoking in cars with children: findings from the ITC Four Country Survey. *Eur J Public Health* 2011;21(3):360-5.

- 1  
2  
3  
4  
5  
6  
7  
8 7. Li Q, Hyland A, O'Connor R et al. Support for smoke-free policies among smokers  
9 and non-smokers in six cities in China: ITC China Survey. *Tob Control* 2010;19 Suppl 2:i40-  
10  
11  
12 6.  
13  
14  
15  
16 8. Pacheco J. Trends-Public Opinion on Smoking and Anti-Smoking Policies. *Public*  
17  
18 *Opin Quart* 2011;75(3):576-92.  
19  
20  
21  
22 9. Wong G, Pawson R, Owen L. Policy guidance on threats to legislative interventions  
23  
24 in public health: a realist synthesis. *BMC Public Health* 2011;11:222.  
25  
26  
27  
28 [10. Danishevski K, Gilmore A, McKee M. Public attitudes towards smoking and tobacco](#)  
29 [control policy in Russia. \*Tob Control\* 2008;17\(4\):276-83.](#)  
30  
31  
32  
33  
34 [11. Gardner B, West R. Public support in England for raising the price of cigarettes to](#)  
35 [fund tobacco control activities. \*Tob Control\* 2010;19\(4\):331-3.](#)  
36  
37  
38  
39  
40 [12. Wilson N, Weerasekera D, Edwards R et al. Characteristics of smoker support for](#)  
41 [increasing a dedicated tobacco tax: national survey data from New Zealand. \*Nicotine Tob Res\*](#)  
42 [2010;12\(2\):168-73.](#)  
43  
44  
45  
46  
47  
48 13. Francis JA, Abramssohn EM, Park HY. Policy-driven tobacco control. *Tob Control*  
49  
50 2010;19 Suppl 1:i16-20.  
51  
52  
53  
54 14. Scollo M, Winstanley M. Tobacco in Australia: Facts and Issues. Melbourne: Cancer  
55  
56 Council Victoria. 2008.  
57  
58  
59  
60



- 1  
2  
3  
4  
5  
6  
7  
8 [15. Hammond D, Dockrell M, Arnott D et al. Cigarette pack design and perceptions of](#)  
9 [risk among UK adults and youth. \*Eur J Public Health\* 2009;19\(6\):631-7.](#)  
10  
11  
12  
13  
14 [16. Wakefield MA, Germain D, Durkin SJ. How does increasingly plainer cigarette](#)  
15 [packaging influence adult smokers' perceptions about brand image? An experimental study.](#)  
16 [Tob Control 2008;17\(6\):416-21.](#)  
17  
18  
19  
20  
21  
22 [17. Germain D, Wakefield MA, Durkin SJ. Adolescents' perceptions of cigarette brand](#)  
23 [image: does plain packaging make a difference? \*J Adolesc Health\* 2010;46\(4\):385-92.](#)  
24  
25  
26  
27  
28 [18. Hoek J, Gendall P, Gifford H et al. Tobacco Branding, Plain Packaging, Pictorial](#)  
29 [Warnings, and Symbolic Consumption. \*Qual Health Res\* 2011 Dec 27.](#)  
30  
31  
32  
33  
34 [19. Thrasher JF, Rousu MC, Hammond D et al. Estimating the impact of pictorial health](#)  
35 [warnings and "plain" cigarette packaging: evidence from experimental auctions among adult](#)  
36 [smokers in the United States. \*Health Policy\* 2011;102\(1\):41-8.](#)  
37  
38  
39  
40  
41  
42 [20. Doxey J, Hammond D. Deadly in pink: the impact of cigarette packaging among](#)  
43 [young women. \*Tob Control\* 2011;20\(5\):353-60.](#)  
44  
45  
46  
47  
48 21. Moodie C, Mackintosh AM, Hastings G et al. Young adult smokers' perceptions of  
49 plain packaging: a pilot naturalistic study. *Tob Control* 2011;20(5):367-73.  
50  
51  
52  
53  
54  
55  
56  
57  
58  
59  
60

1  
2  
3  
4  
5  
6  
7  
8 22. Gallopel-Morvan K, Moodie C, Hammond D et al. Consumer perceptions of cigarette  
9 pack design in France: a comparison of regular, limited edition and plain packaging. *Tob*  
10 *Control* Published Online First: 13 October 2011. doi:10.1136/tobaccocontrol-2011-050079  
11  
12

13  
14  
15  
16 23. Chapman S, Freeman B. From brand to bland--the demise of cigarette packaging.  
17 *BMJ* 2011;343:d4376.  
18  
19

20  
21  
22 [24. Wakefield M. Welcome to cardboard country: how plain packaging could change the](#)  
23 [subjective experience of smoking. \*Tob Control\* 2011;20\(5\):321-2.](#)  
24  
25

26  
27  
28 25. Freeman B. Tobacco plain packaging legislation: a content analysis of commentary  
29 posted on Australian online news. *Tob Control* 2011;20(5):361-6.  
30  
31

32  
33  
34 [26. Smart RG, Stoduto G. Interventions by students in friends' alcohol, tobacco, and drug](#)  
35 [use. \*J Drug Educ\* 1997;27\(3\):213-22.](#)  
36  
37

38  
39  
40 27. Cooper J, Borland R, Yong HH et al. Compliance and support for bans on smoking in  
41 licensed venues in Australia: findings from the International Tobacco Control Four-Country  
42 Survey. *Aust N Z J Public Health* 2010;34(4):379-85.  
43  
44  
45

46  
47  
48 [28. Fong GT, Hyland A, Borland R et al. Reductions in tobacco smoke pollution and](#)  
49 [increases in support for smoke-free public places following the implementation of](#)  
50 [comprehensive smoke-free workplace legislation in the Republic of Ireland: findings from](#)  
51 [the ITC Ireland/UK Survey. \*Tob Control\* 2006;15 Suppl 3:iii51-8.](#)  
52  
53  
54  
55

- 1  
2  
3  
4  
5  
6  
7  
8 [29. Hyland A, Hassan LM, Higbee C et al. The impact of smokefree legislation in](#)  
9 [Scotland: results from the Scottish ITC: Scotland/UK longitudinal surveys. \*Eur J Public\*](#)  
10 [Health 2009;19\(2\):198-205.](#)  
11  
12  
13  
14  
15  
16 30. Borland R, Yong HH, Siahpush M et al. Support for and reported compliance with  
17 smoke-free restaurants and bars by smokers in four countries: findings from the International  
18 Tobacco Control (ITC) Four Country Survey. *Tob Control* 2006;15 Suppl 3:iii34-41.  
19  
20  
21  
22  
23  
24 31. Thomson G, Wilson N, Edwards R. At the frontier of tobacco control: A brief review  
25 of public attitudes toward smoke-free outdoor places. *Nicotine Tob Res* 2009;11(6):584-90.  
26  
27  
28  
29  
30 32. Doucet JM, Velicer WF, Laforge RG. Demographic differences in support for  
31 smoking policy interventions. *Addict Behav* 2007;32(1):148-57.  
32  
33  
34  
35  
36 [33. Davis RM, Wakefield M, Amos A et al. The Hitchhiker's Guide to Tobacco Control: a](#)  
37 [global assessment of harms, remedies, and controversies. \*Annu Rev Public Health\*](#)  
38 [2007;28:171-94.](#)  
39  
40  
41  
42  
43  
44 [34. Nagelhout GE, van den Putte B, de Vries H et al. The influence of newspaper](#)  
45 [coverage and a media campaign on smokers' support for smoke-free bars and restaurants and](#)  
46 [on secondhand smoke harm awareness: findings from the International Tobacco Control](#)  
47 [\(ITC\) Netherlands Survey. \*Tob Control\* 2012;21\(1\):24-9.](#)  
48  
49  
50  
51  
52  
53  
54  
55  
56  
57  
58  
59  
60

- 1  
2  
3  
4  
5  
6  
7  
8 [35. Harris JK, Shelton SC, Moreland-Russell S et al. Tobacco coverage in print media: the use of timing and themes by tobacco control supporters and opposition before a failed tobacco tax initiative. \*Tob Control\* 2010;19\(1\):37-43.](#)  
9  
10  
11  
12  
13  
14  
15  
16 36. Australian Bureau of Statistics. Smoking and risk behaviours in Australia, 2007-08. Catalogue No 4841.0. Canberra2011.  
17  
18  
19  
20  
21  
22 [37. Davis P, Joyce S. Health and Wellbeing of Adults in Western Australia 2010. Overview and Trends. Perth: Department of Health, Western Australia2011.](#)  
23  
24  
25  
26  
27  
28 38. Wood LJ, Rosenberg M, Clarkson J et al. Encouraging Young Western Australians to Be Smarter Than Smoking. *Am J Health Promot* 2009;23(6):403-11.  
29  
30  
31  
32  
33  
34 [39. Mitchell J, Rosenberg M, Wood L. Adolescents with attitude ... changes in views about smoking over time. \*Health Promot J Austr\* 2008;19\(2\):109-12.](#)  
35  
36  
37  
38  
39  
40 [40. Australian Communications and Media Authority. Convergence and Communications Report 1: Australian household consumers' take-up and use of voice communications services. Canberra: Australian Communications and Media Authority 2012.](#)  
41  
42  
43  
44  
45  
46  
47  
48 41. Australian Bureau of Statistics. CDATA01. Canberra, ACT: Australian Bureau of  
49  
50  
51  
52  
53  
54  
55  
56  
57  
58  
59  
60

- 1  
2  
3  
4  
5  
6  
7  
8 [42. Munafo MR, Roberts N, Bauld L et al. Plain packaging increases visual attention to](#)  
9 [health warnings on cigarette packs in non-smokers and weekly smokers but not daily](#)  
10 [smokers. \*Addiction\* 2011;106\(8\):1505-10; discussion 11-2.](#)  
11  
12  
13  
14  
15  
16 [43. Fong GT, Hammond D, Laux FL et al. The near-universal experience of regret among](#)  
17 [smokers in four countries: findings from the International Tobacco Control Policy Evaluation](#)  
18 [Survey. \*Nicotine Tob Res\* 2004;6 Suppl 3:S341-51.](#)  
19  
20  
21  
22  
23  
24 [44. Wilson N, Edwards R, Weerasekera D. High levels of smoker regret by ethnicity and](#)  
25 [socioeconomic status: national survey data. \*N Z Med J\* 2009;3;122\(1292\):99-100.](#)  
26  
27  
28  
29  
30 45. Thomson G, Wilson N, Edwards R et al. Should smoking in outside public spaces be  
31 banned? Yes. *BMJ* 2008;11:337.  
32  
33  
34  
35  
36 [46. Fournier S. Consumers and their brands: Developing relationship theory in consumer](#)  
37 [research. \*Journal of Consumer Research\*. 1998;24:343-73.](#)  
38  
39  
40  
41  
42  
43  
44  
45  
46  
47  
48  
49  
50  
51  
52  
53  
54  
55  
56  
57  
58  
59  
60
